# Supplementary material for: Anti-Inflammatory Activity of Soluble Epoxide Hydrolase Inhibitors Based on Selenoureas Bearing an Adamantane Moiety
Source: MDPI journal article supplement (doi:10.3390/ijms231810710), 2022-09-14

## **Anti-Inflammatory Activity of Soluble Epoxide Hydrolase Inhibitors Based on Selenoureas Bearing an Adamantane Moiety**

Vladimir Burmistrov <sup>1,2,\*</sup>, Christophe Morisseau <sup>1</sup>, Denis A. Babkov <sup>3</sup>, Tatiana Golubeva <sup>4,5</sup>, Dmitry Pitushkin <sup>2</sup>, Elena V. Sokolova <sup>3</sup>, Vladimir Vasipov <sup>6</sup>, Yaroslav Kuznetsov <sup>2</sup>, Sergey V. Bazhenov <sup>7</sup>, Uliana S. Novoyatlova <sup>7</sup>, Nikolay A. Bondarev <sup>7</sup>, Ilya V. Manukhov <sup>7</sup>, Victoria Osipova <sup>8</sup>, Nadezhda Berberova <sup>9</sup>, Alexander A. Spasov <sup>3</sup>, Gennady M. Butov <sup>2</sup> and Bruce D. Hammock <sup>1</sup>

1 Department of Entomology and Nematology, Comprehensive Cancer Center, University of California, Davis, CA 95616, USA

2 Department of Chemistry, Technology and Equipment of Chemical Industry, Volzhsky Polytechnic Institute (Branch), Volgograd State Technical University, 404121 Volzhsky, Russia

3 Department of Pharmacology & Bioinformatics, Scientific Center for Innovative Drugs, Volgograd State Medical University, 400131 Volgograd, Russia

4 Institute of Cytology and Genetics SB RAS, 630090 Novosibirsk, Russia

5 Specialized Educational Scientific Center, Novosibirsk State University, 630090 Novosibirsk, Russia

6 N.I. Vavilov All-Russian Institute of Plant Genetic Resources, 42, 44, Bolshaya Morskaya Street, 190000 St. Petersburg, Russia

7 Research Center for Molecular Mechanisms of Aging and Age-Related Diseases, Moscow Institute of Physics and Technology, Institutsky Lane 9, 141700 Dolgoprudny, Moscow Region, Russia

8 Toxicology Research Group of Southern Scientific Centre of Russian Academy of Science, 41 Chekhova Str., 344006 Rostov-on-Don, Russia

9 Department of Chemistry, Astrakhan State Technical University, 16 Tatisheva Street, 414056 Astrakhan, Russia

\* Correspondence: [crus\\_himself@mail.ru](mailto:crus_himself@mail.ru); Tel.: +7-905-338-2432

**Supplementary Materials**

**NMR, Mass and IR spectra**

# NMR <sup>1</sup>H of compound 1

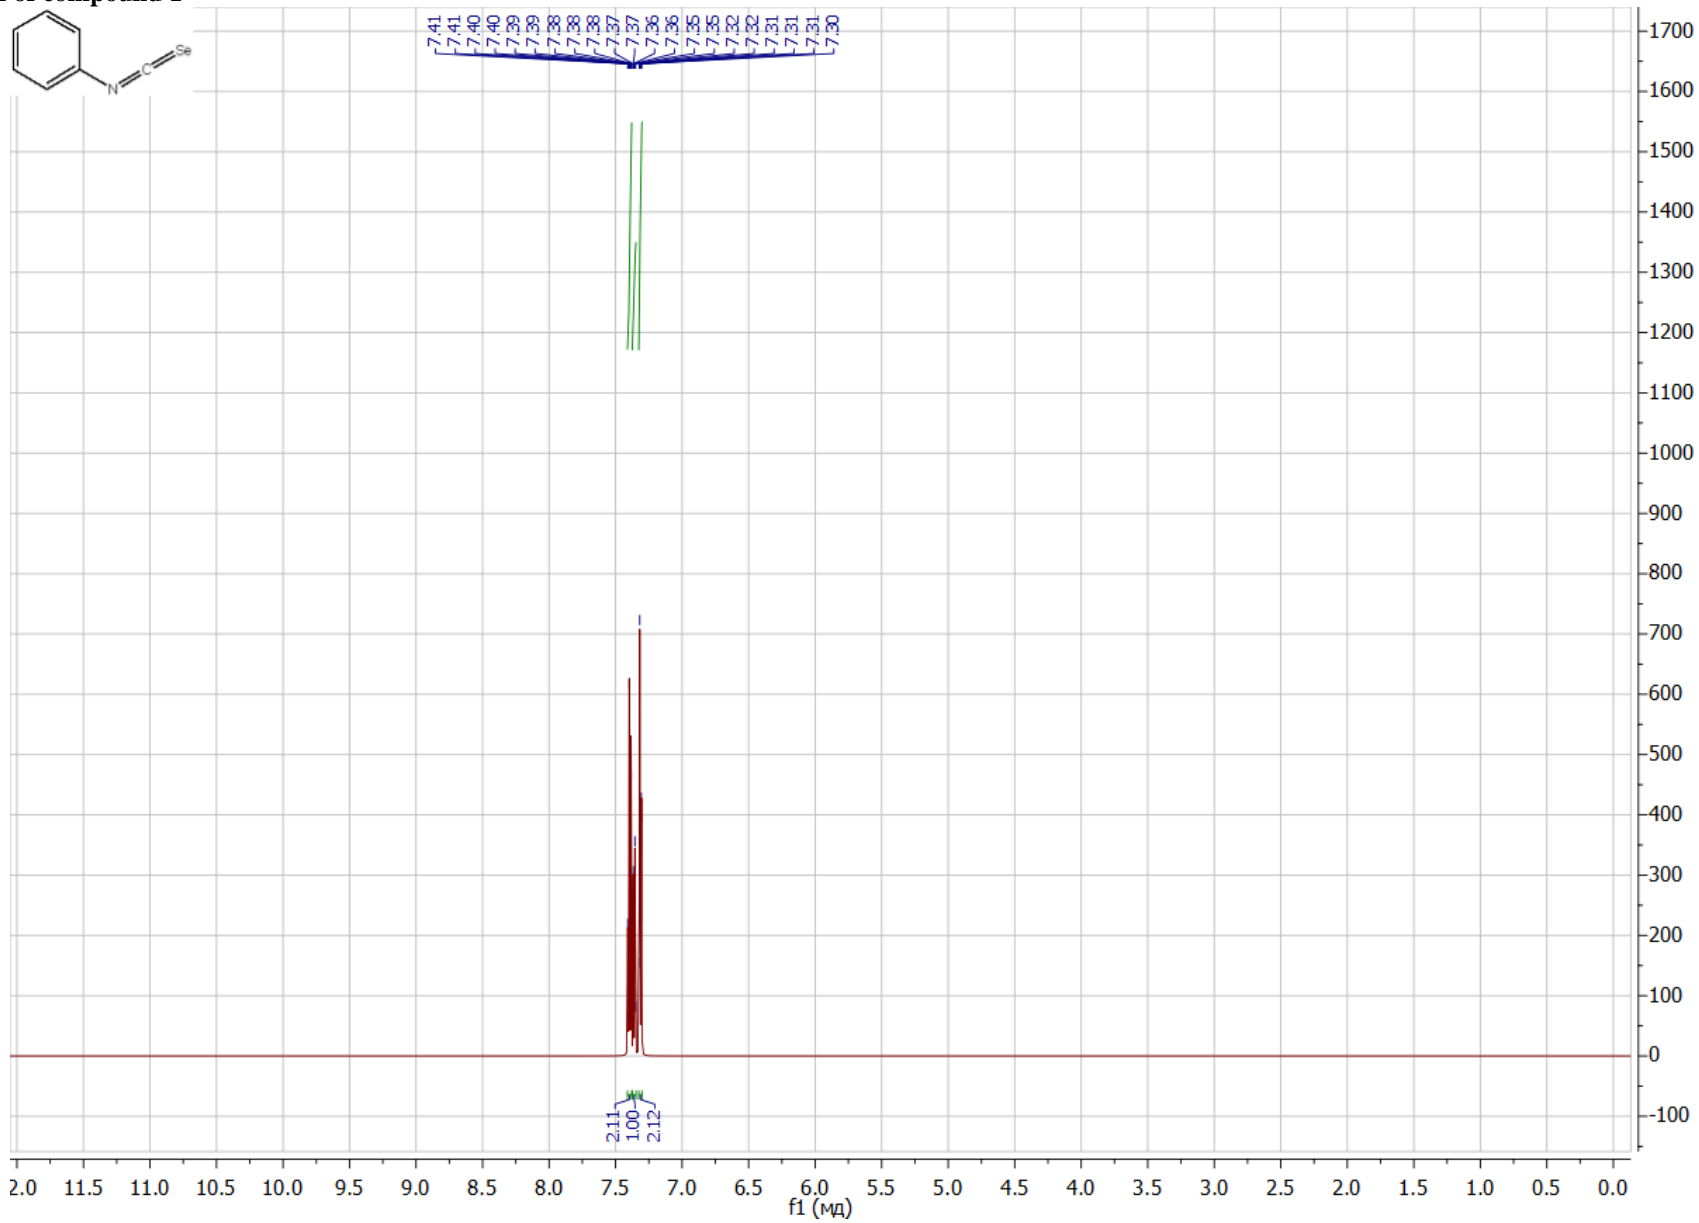

NMR  $^{13}\text{C}$  of compound 1

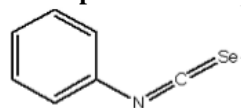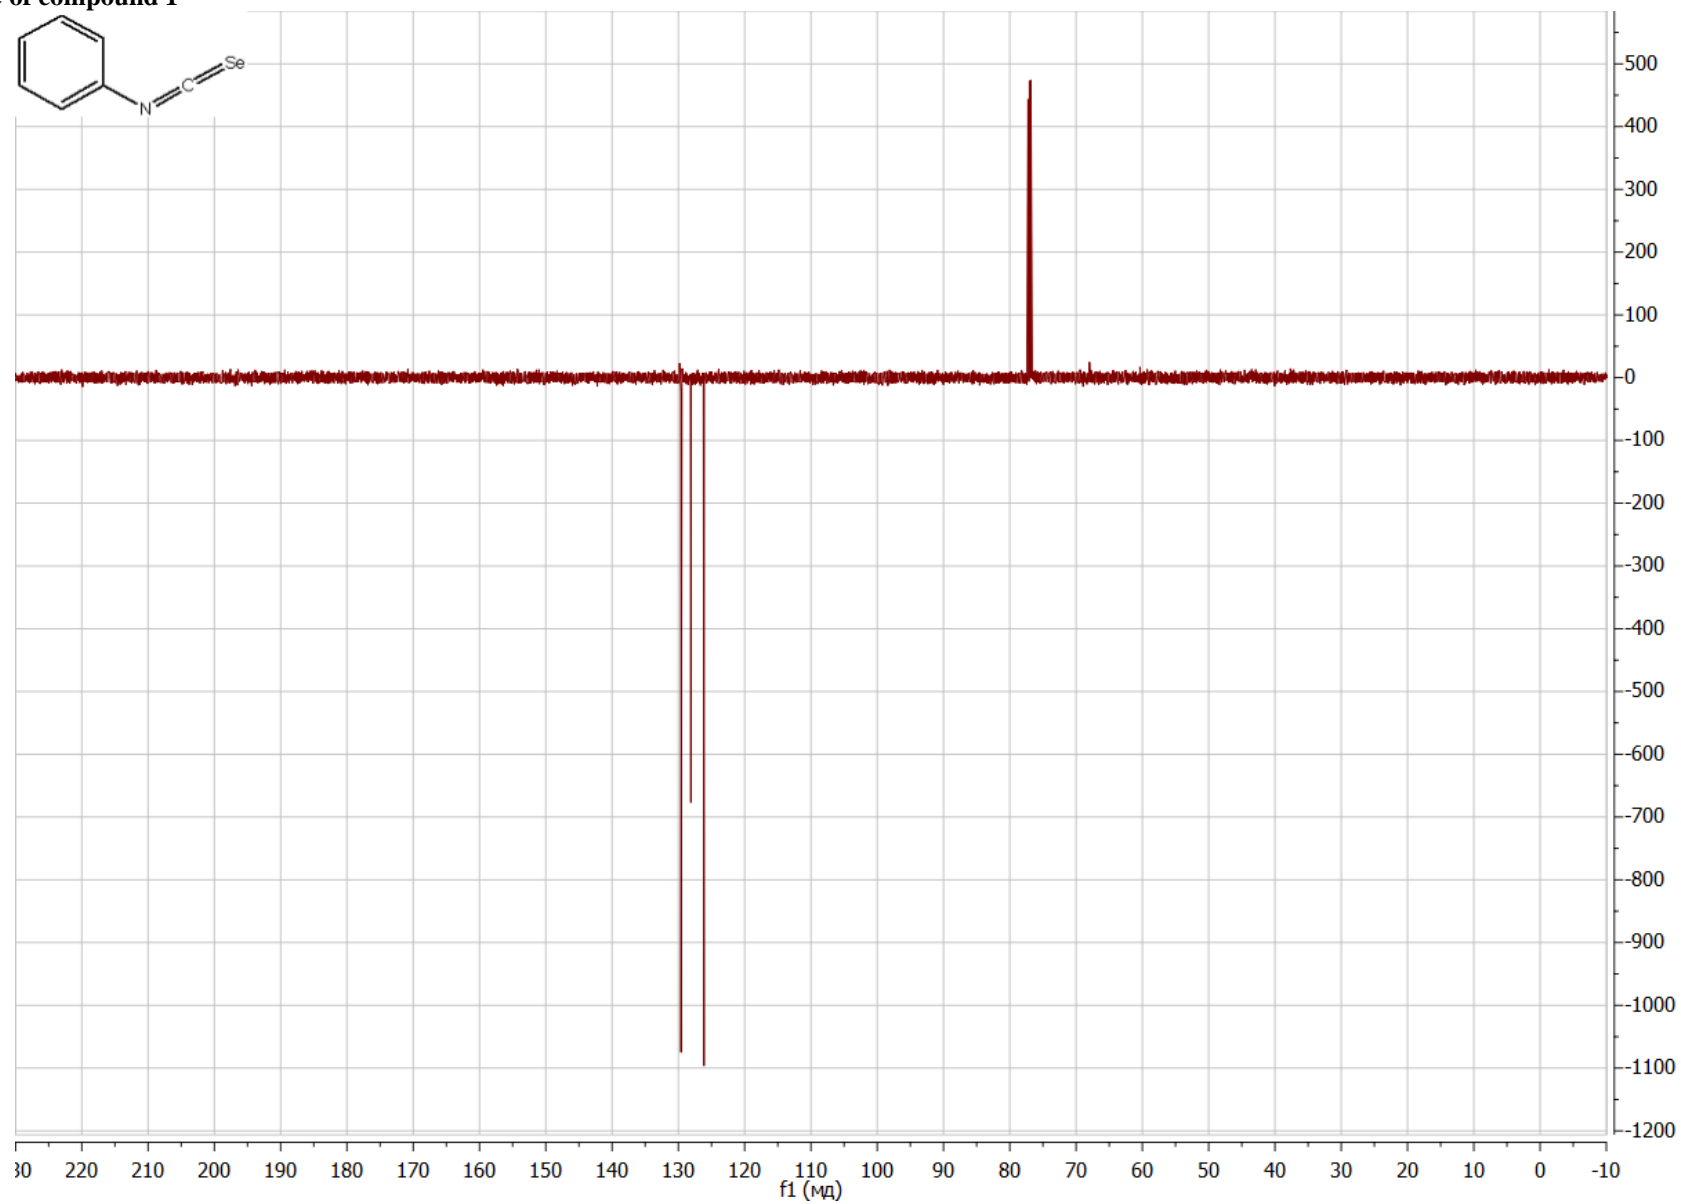

# Chromatogram of compound 1

Abundance

TIC: B\_1946.D\data.ms

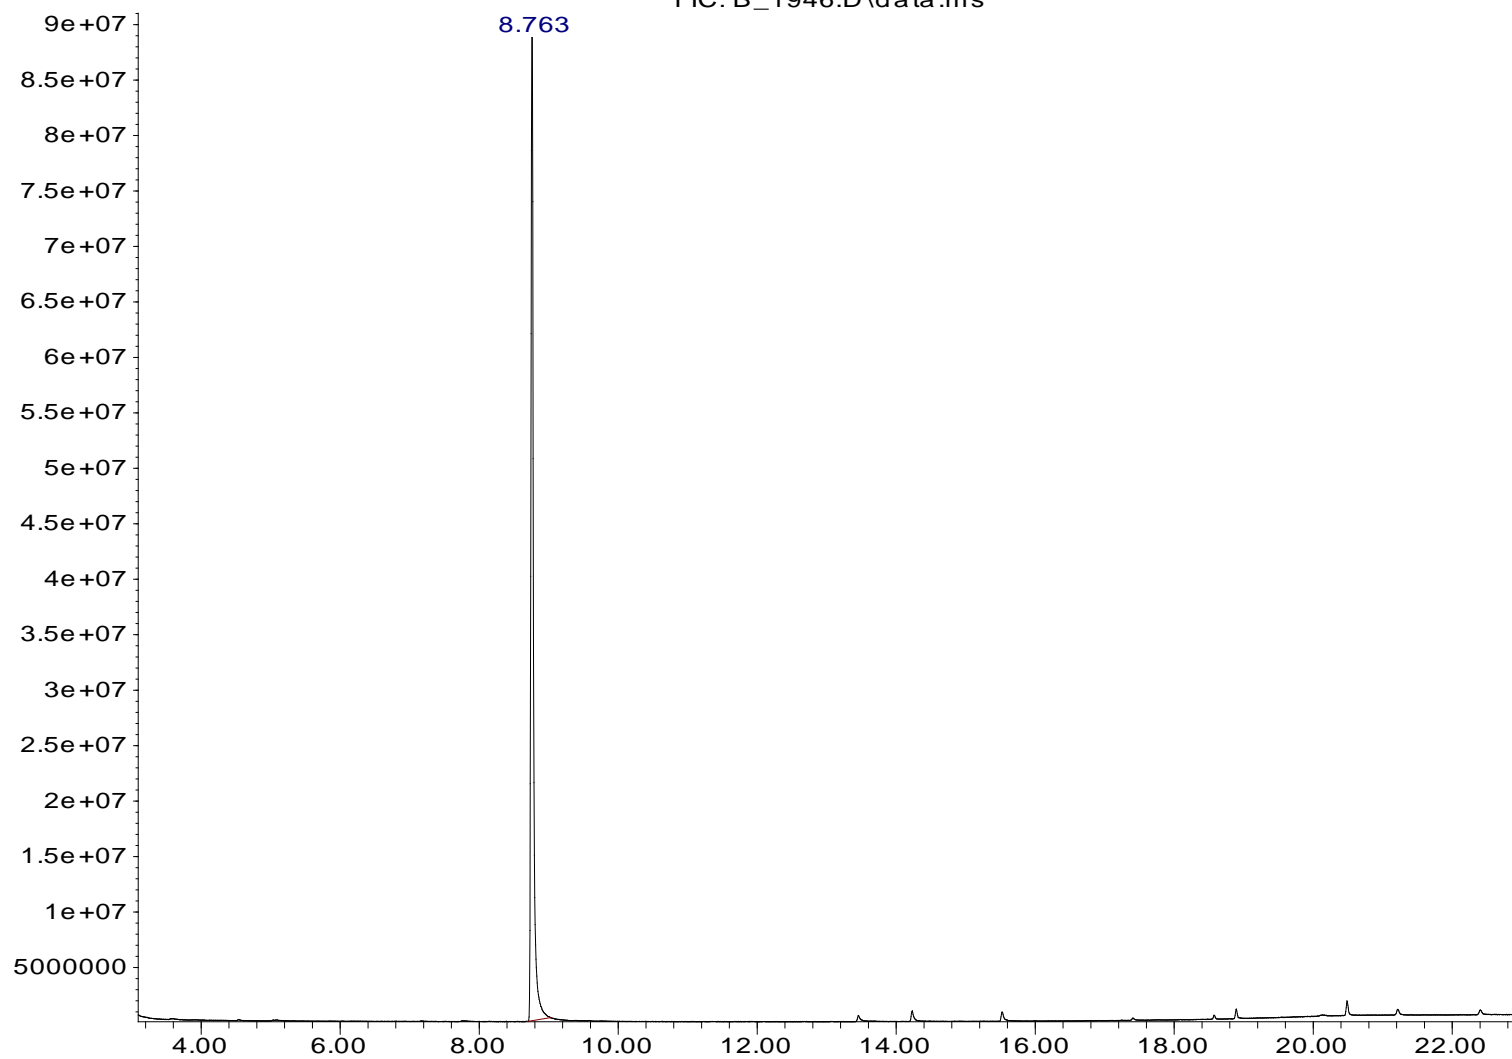

Time-->

# Mass spectrum of compound 1

Abundance

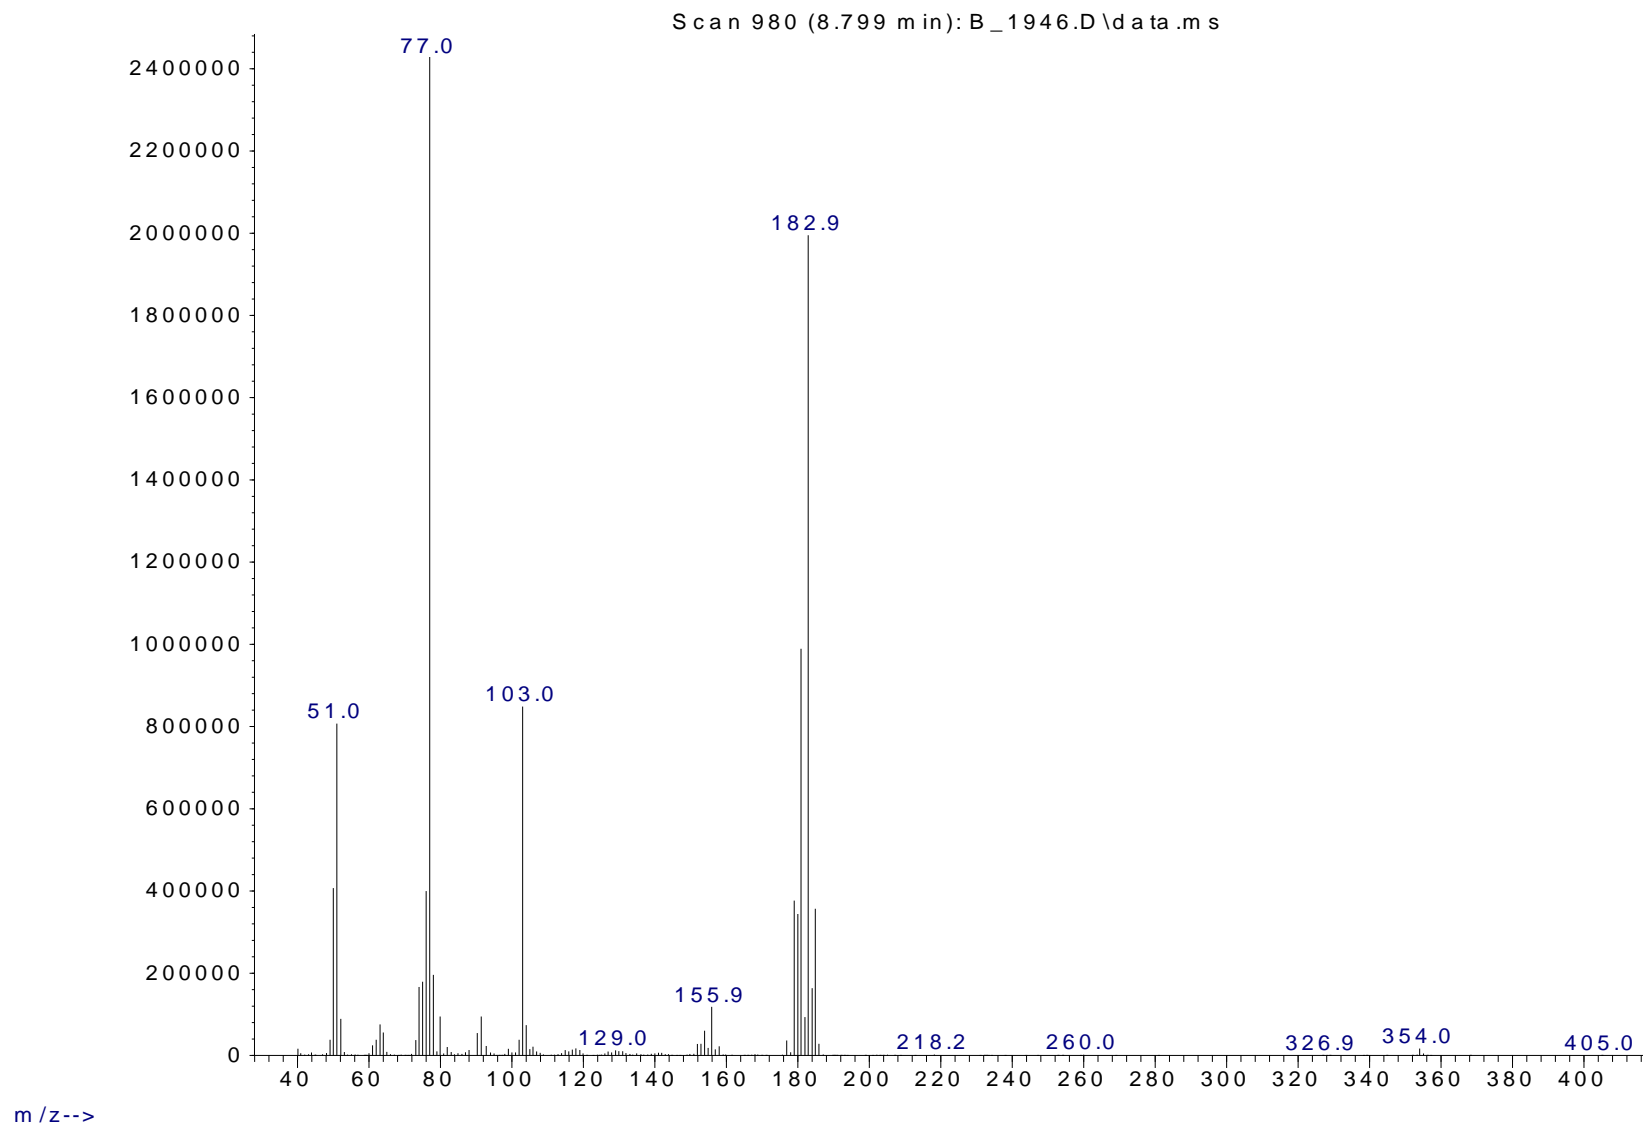

# Chromatogram of compound 2

Abundance

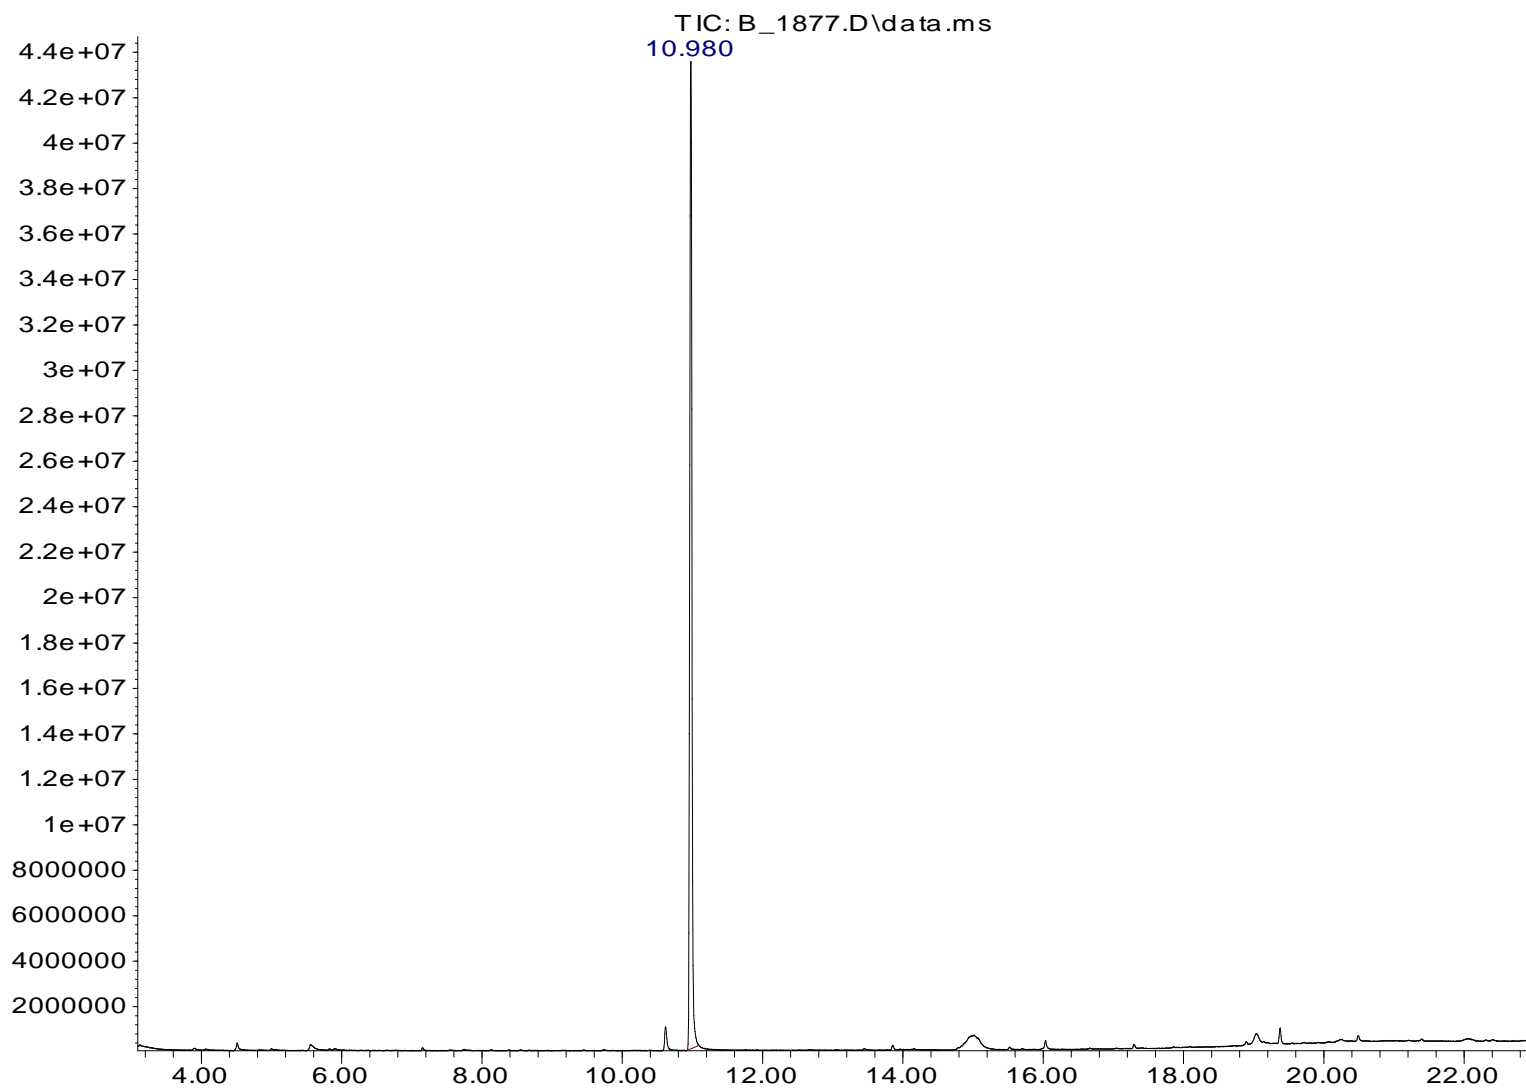

Mass spectrum of compound 2

Abundance

Scan 1353 (10.973 min): B\_1877.D\data.ms

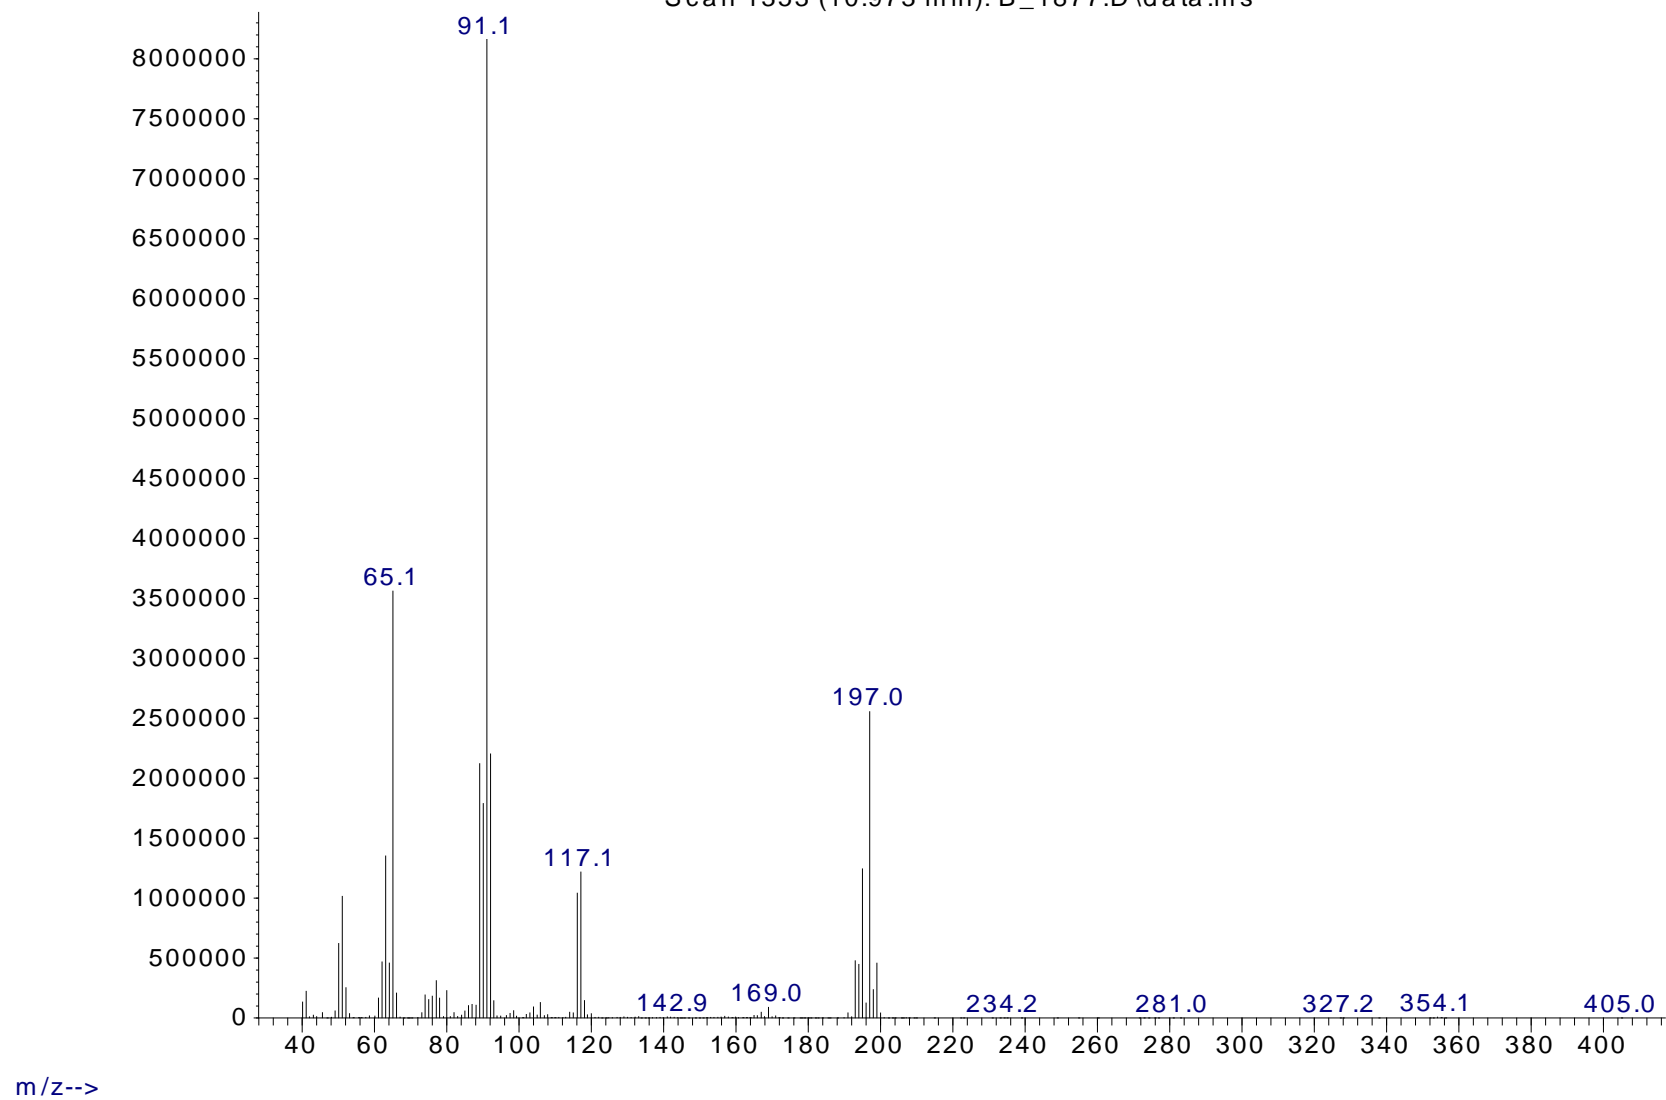



NMR  $^1\text{H}$  of compound 4a

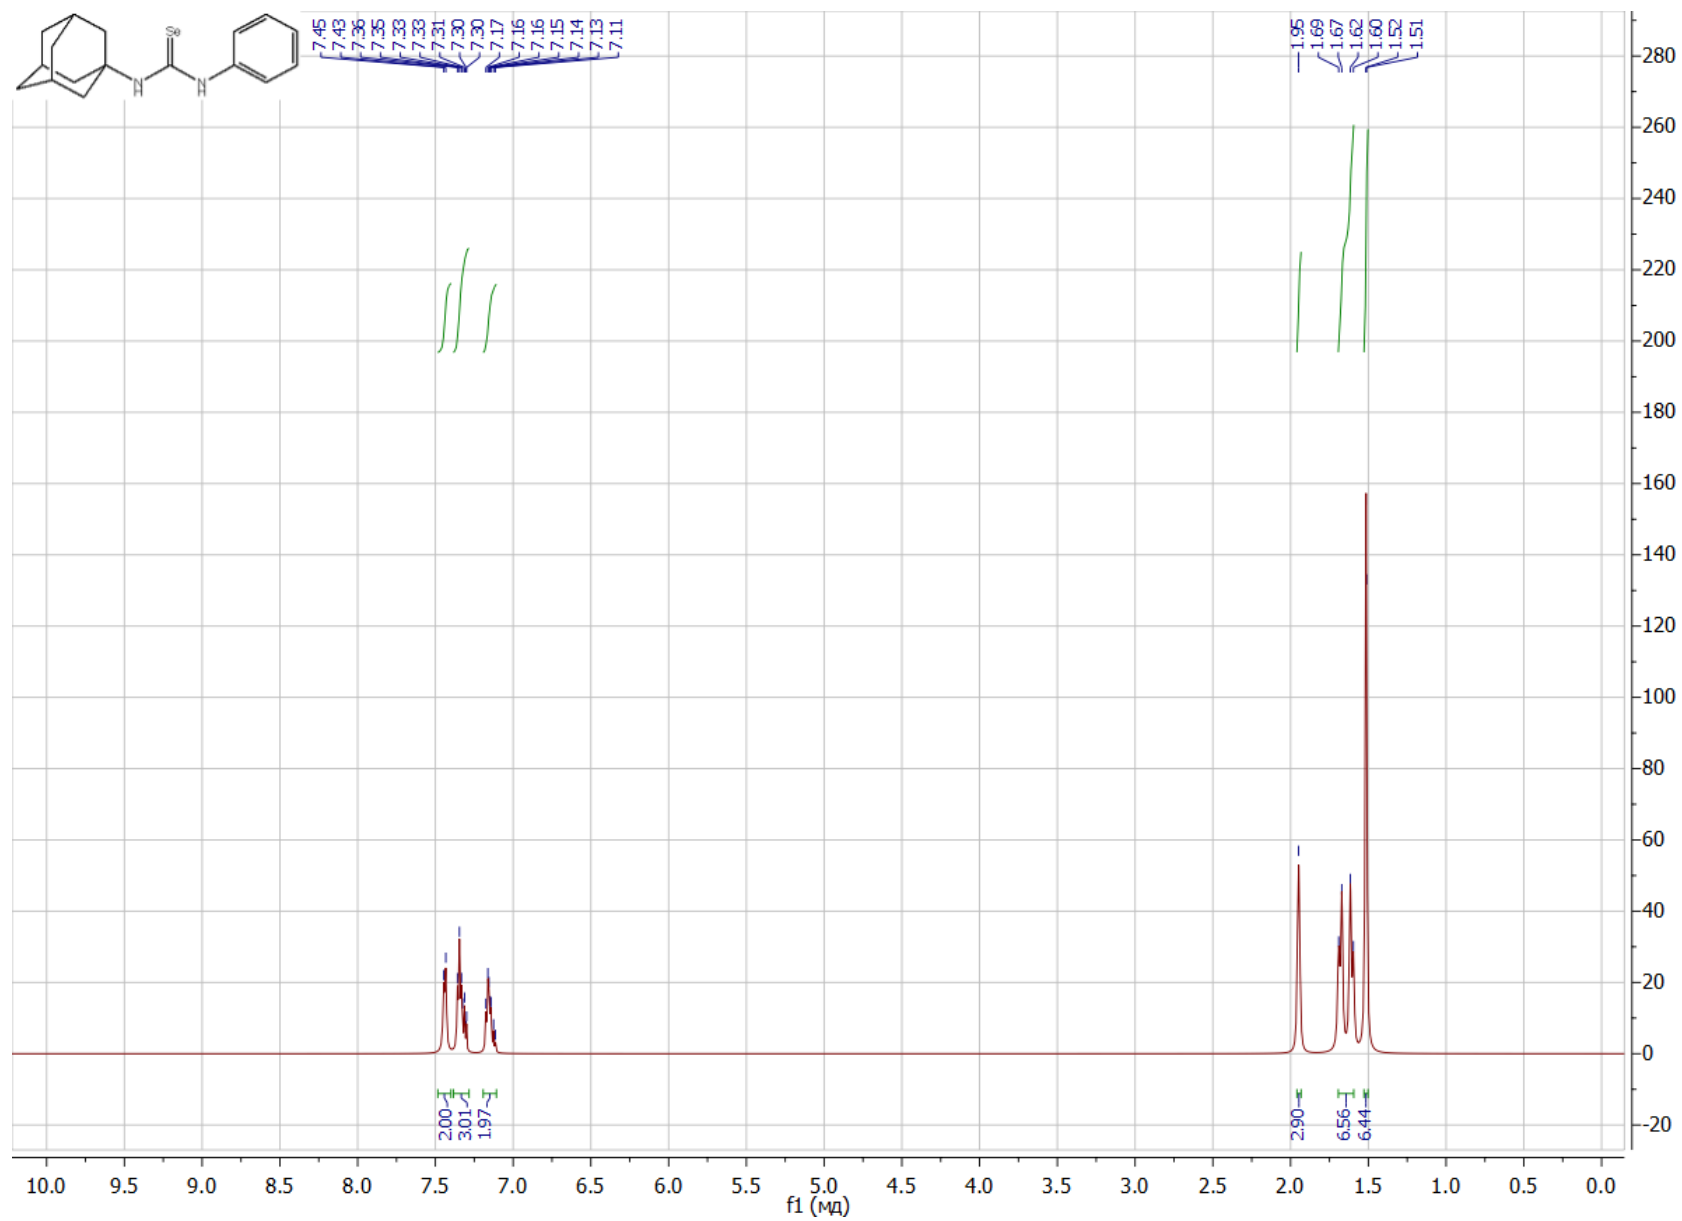

IR of compound 4a

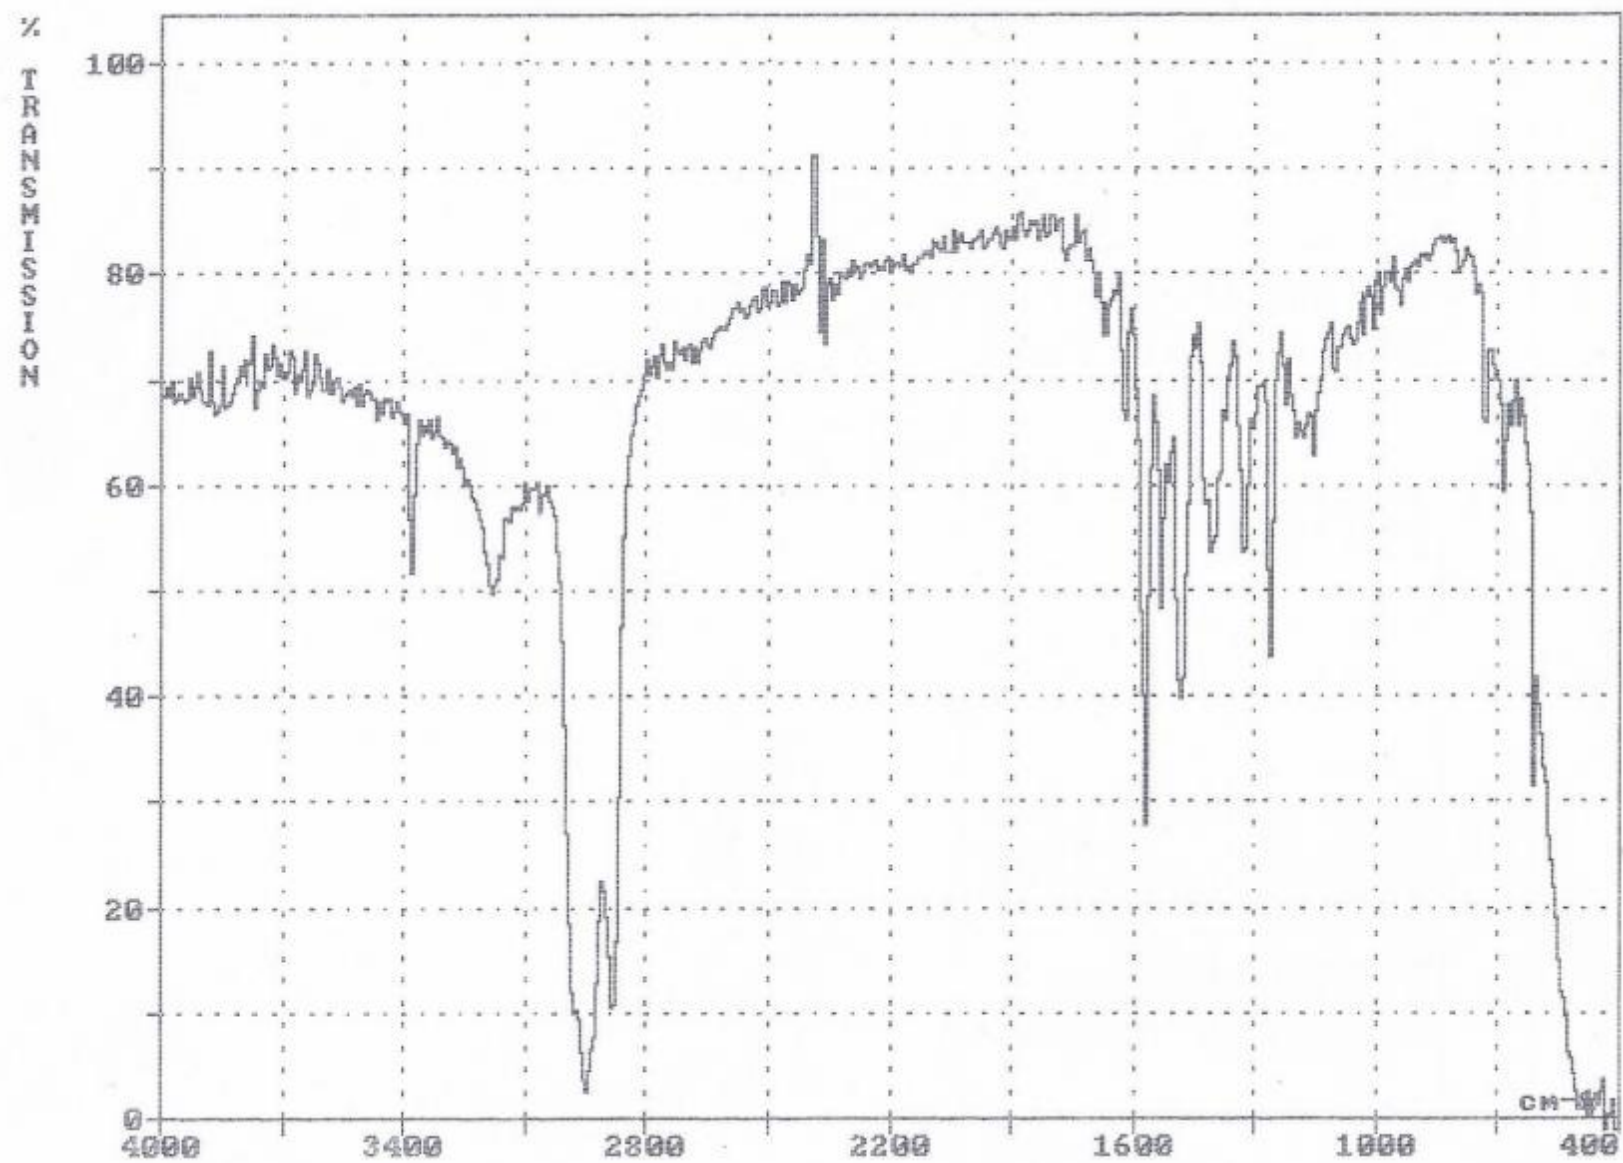

NMR  $^1\text{H}$  of compound 4b

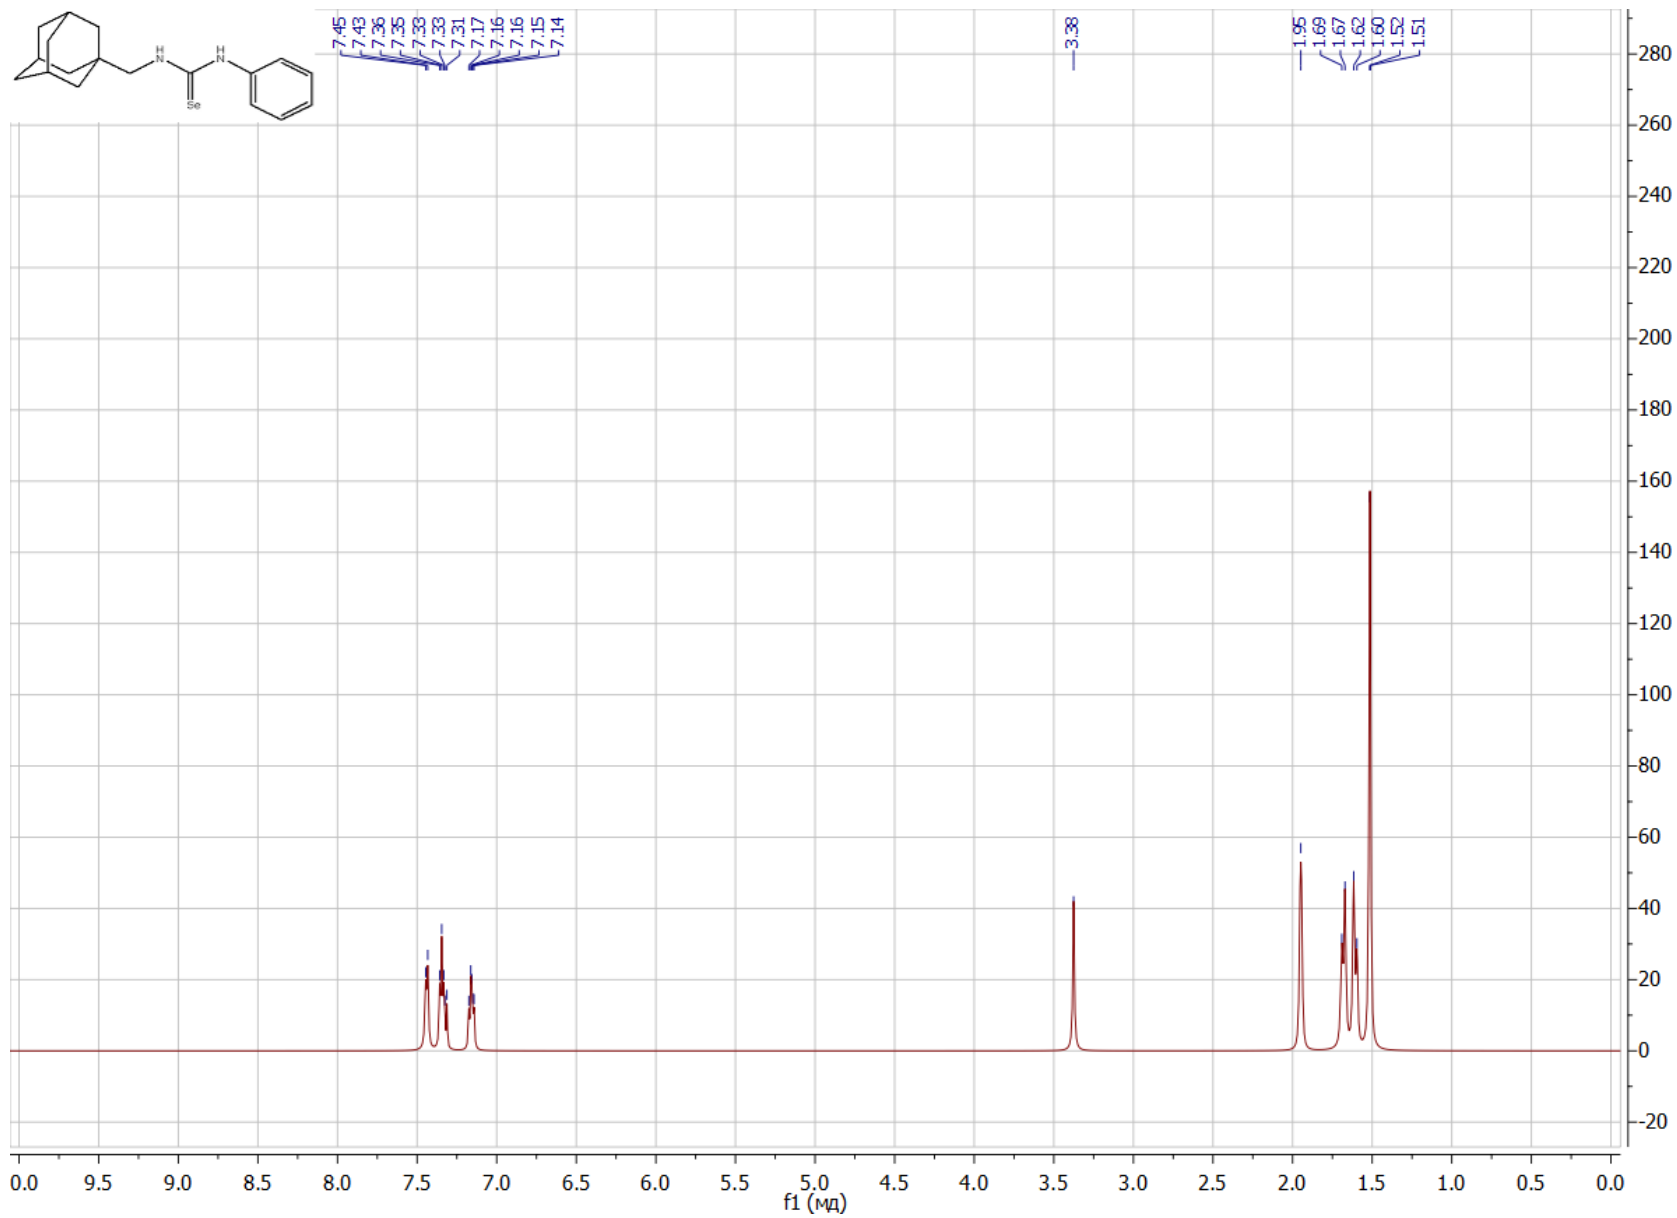

IR of compound 4b

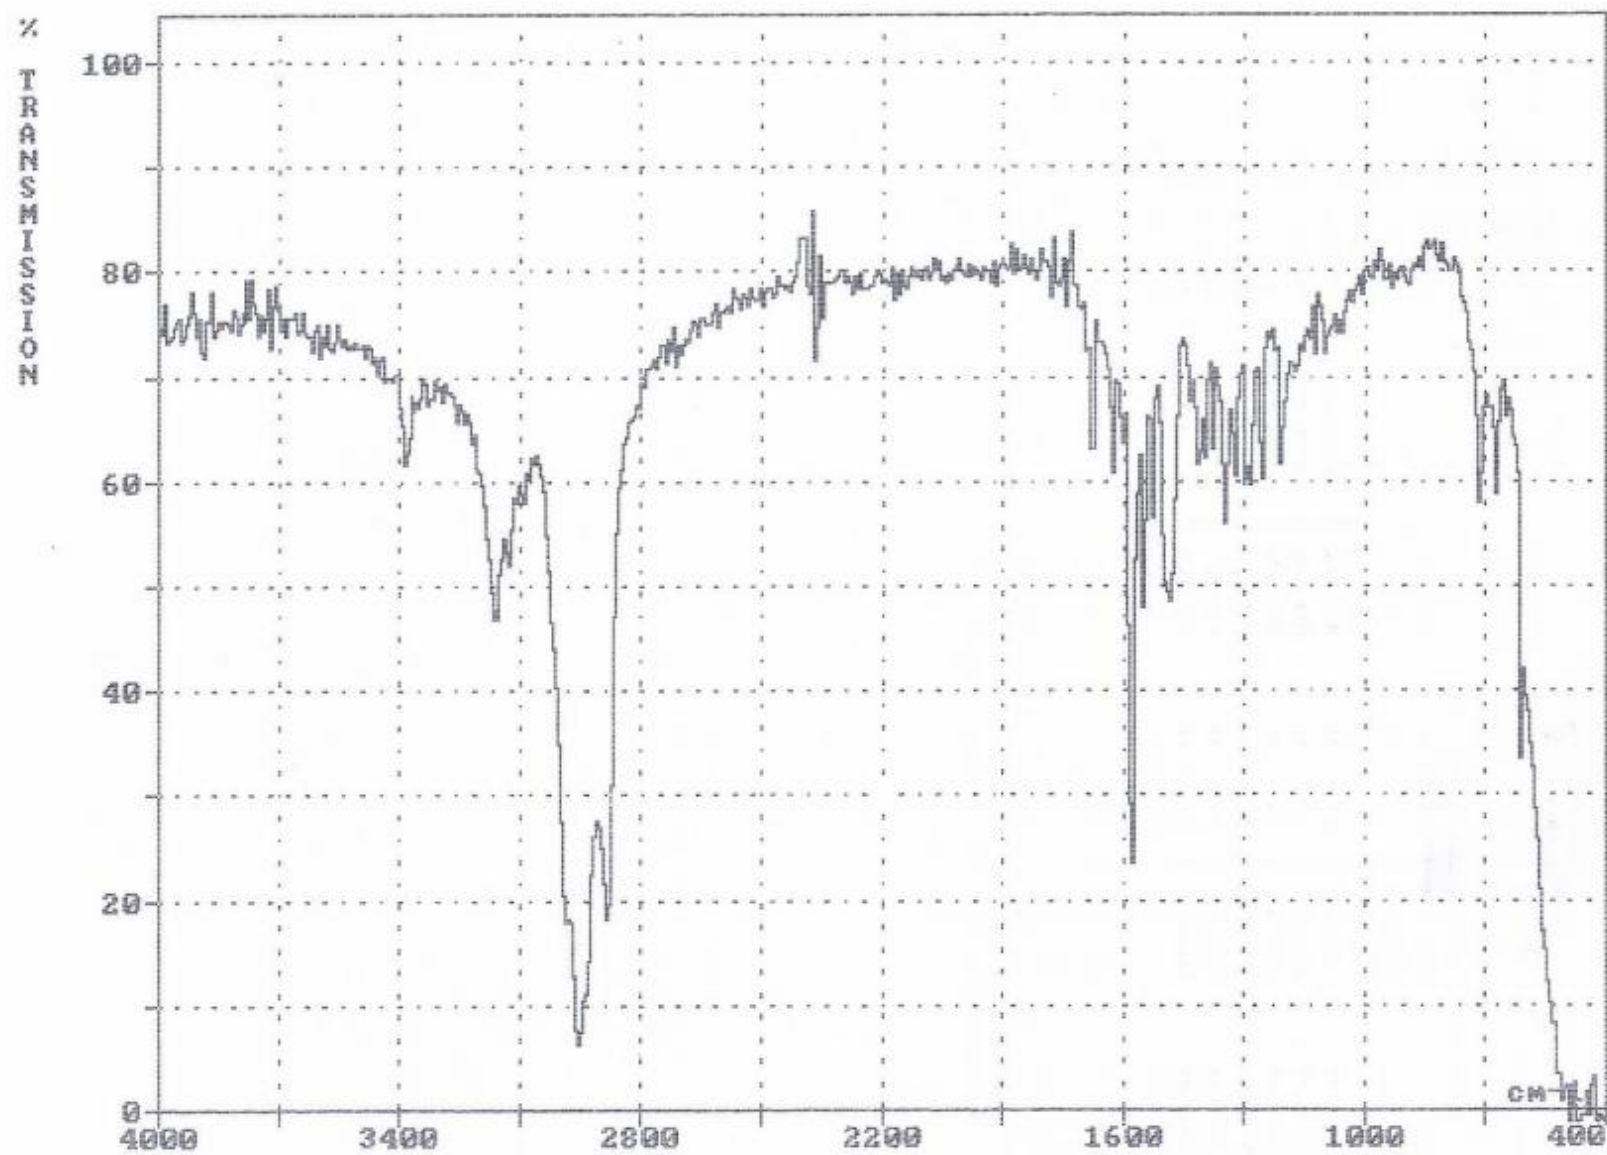

NMR  $^1\text{H}$  of compound 4e

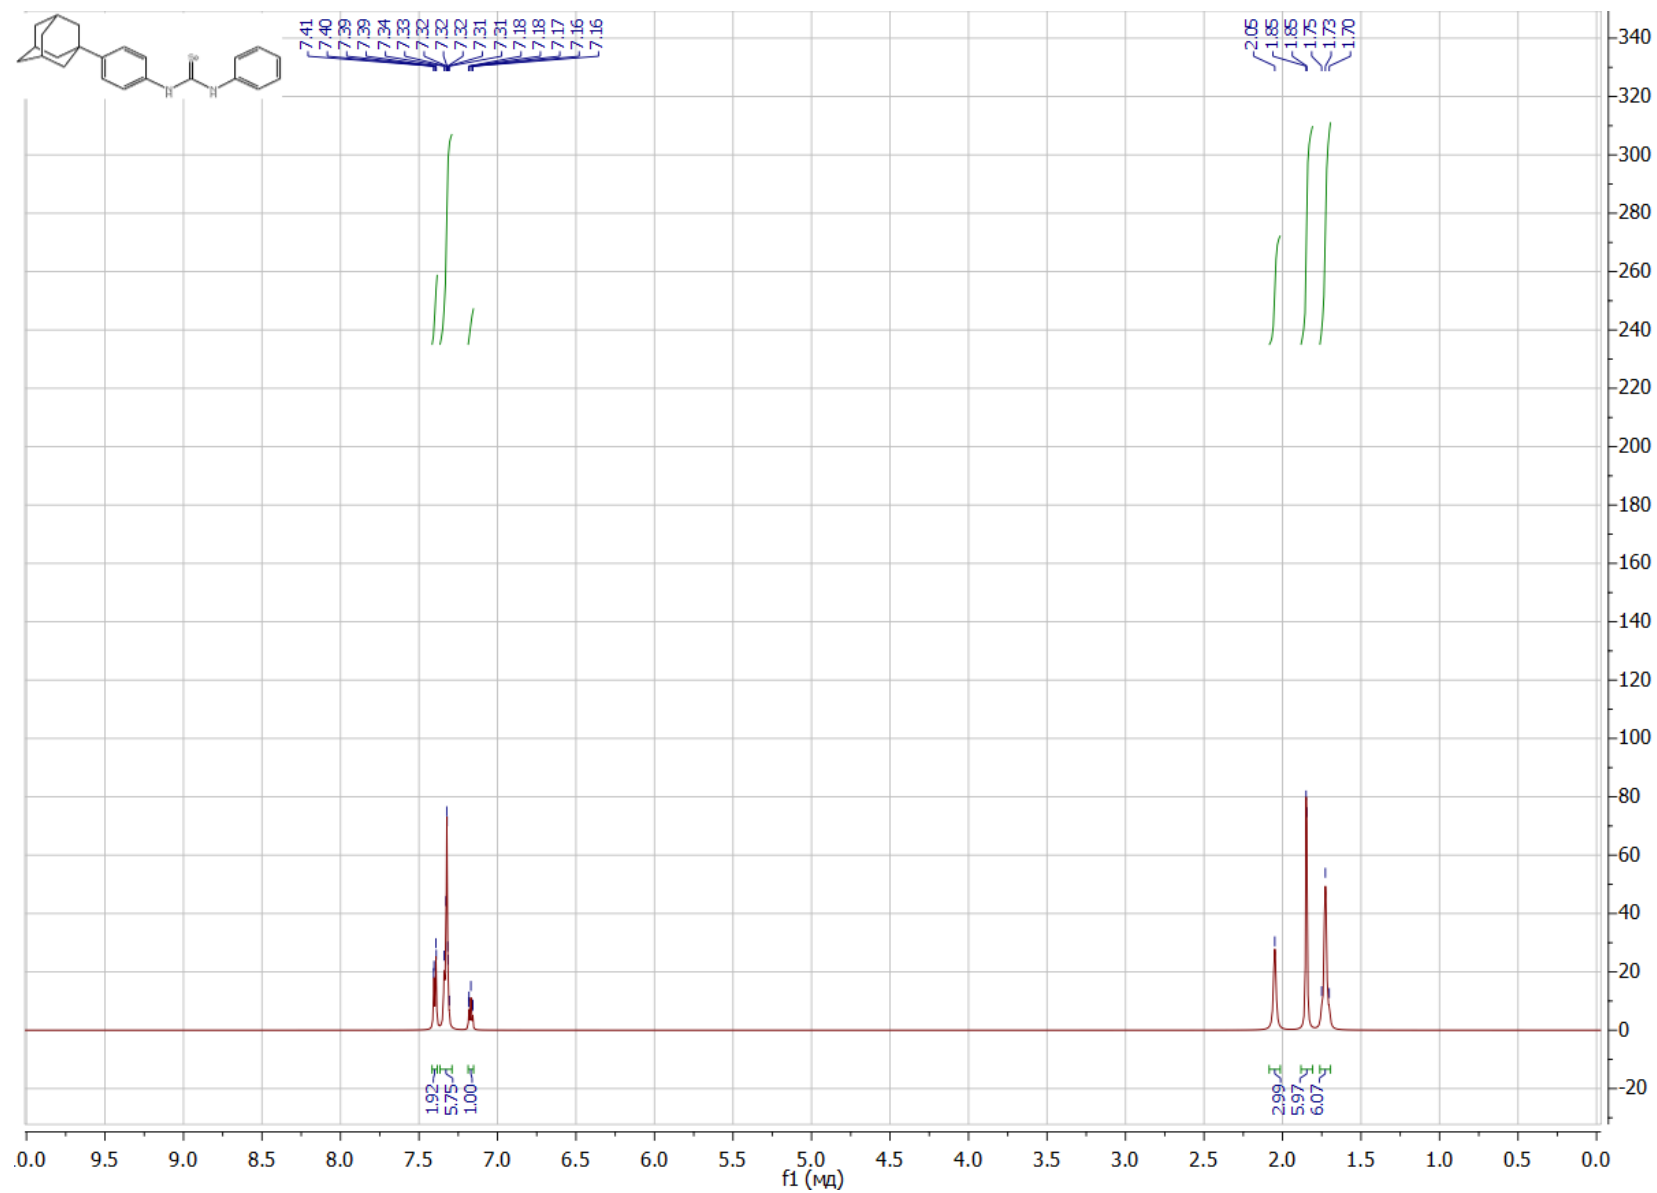

NMR  $^1\text{H}$  of compound 4f

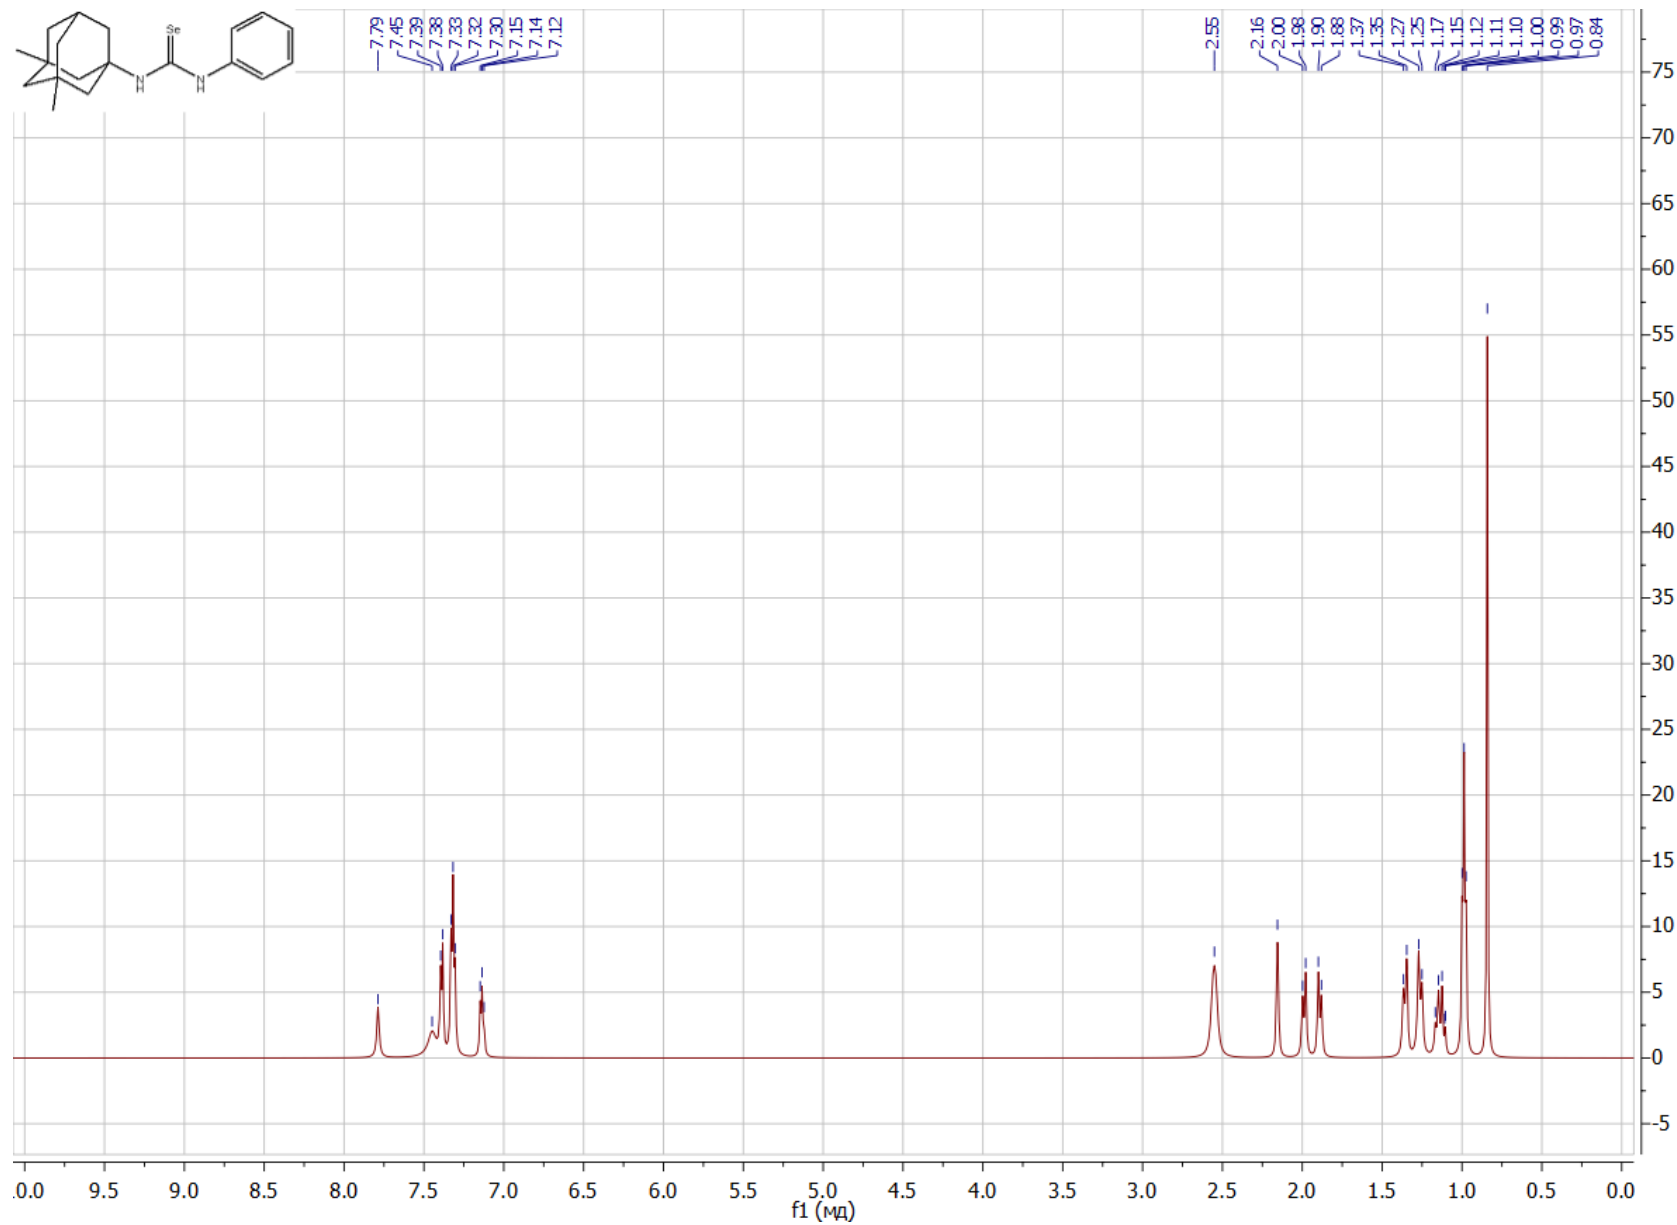

NMR  $^1\text{H}$  of compound 4g

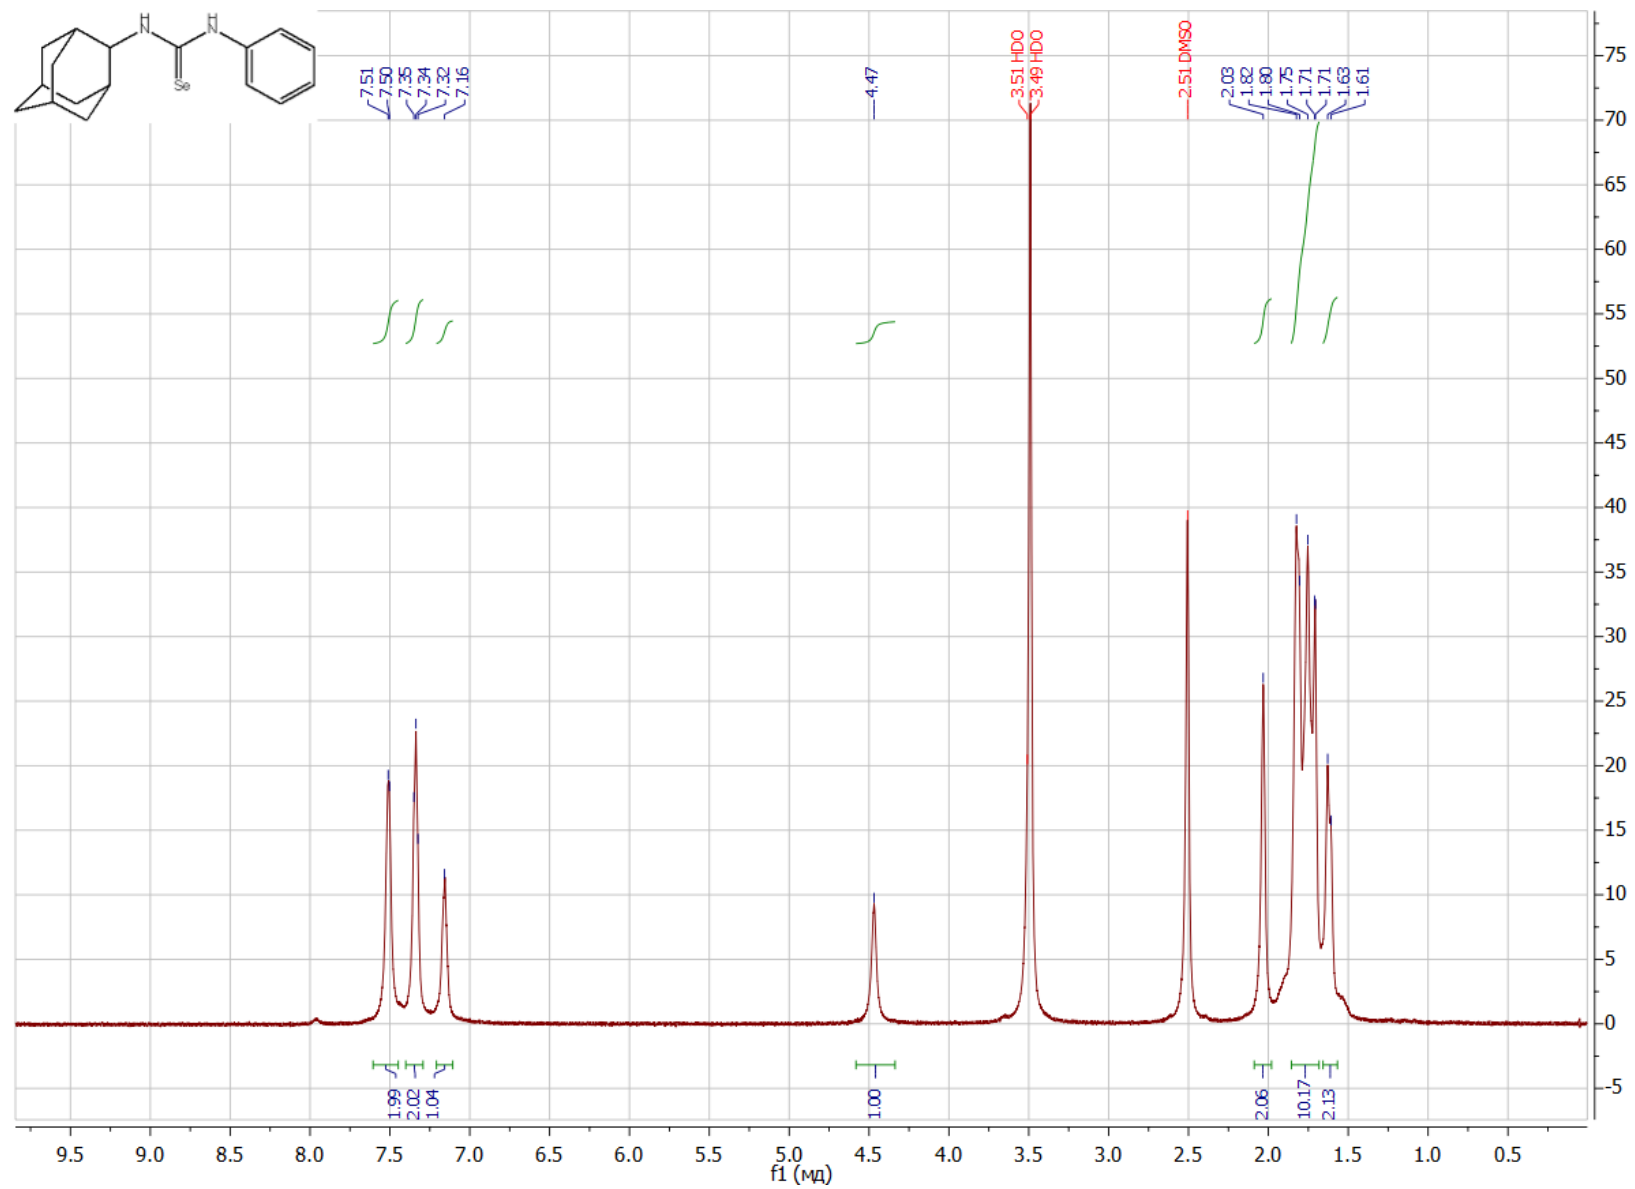

IR of compound 4g

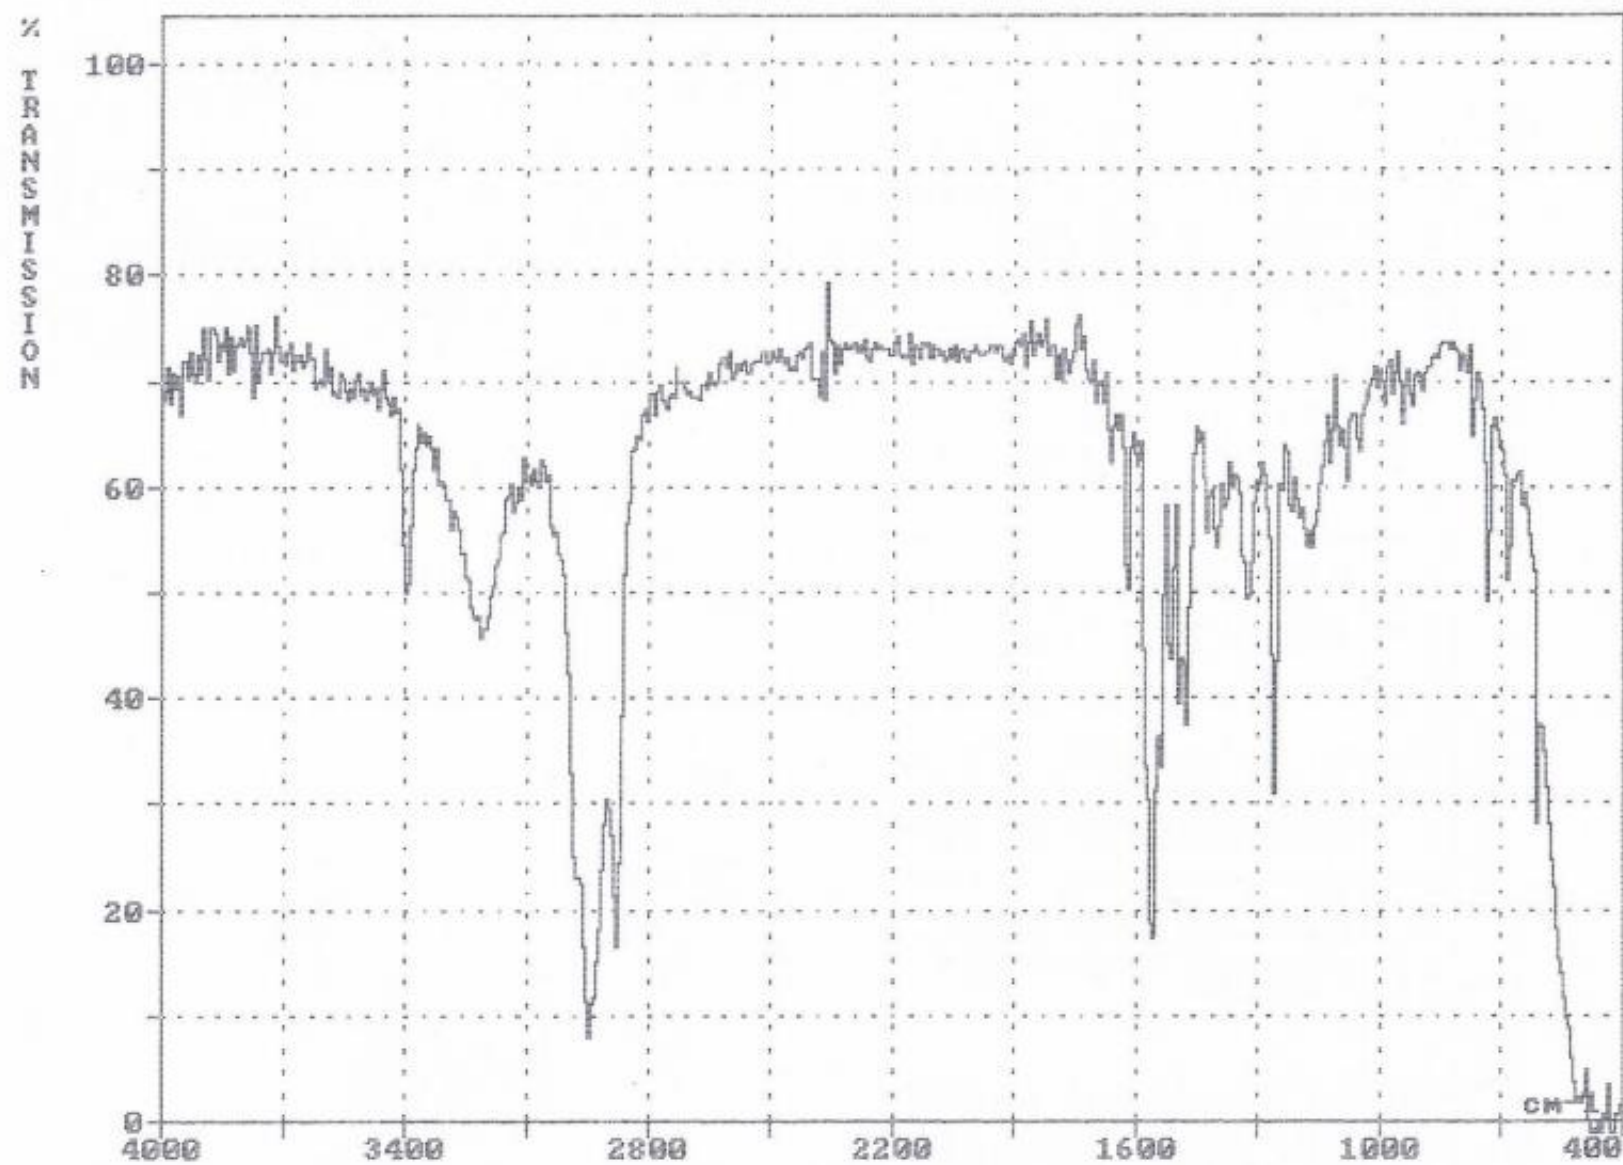



# NMR $^1\text{H}$ of compound 5a

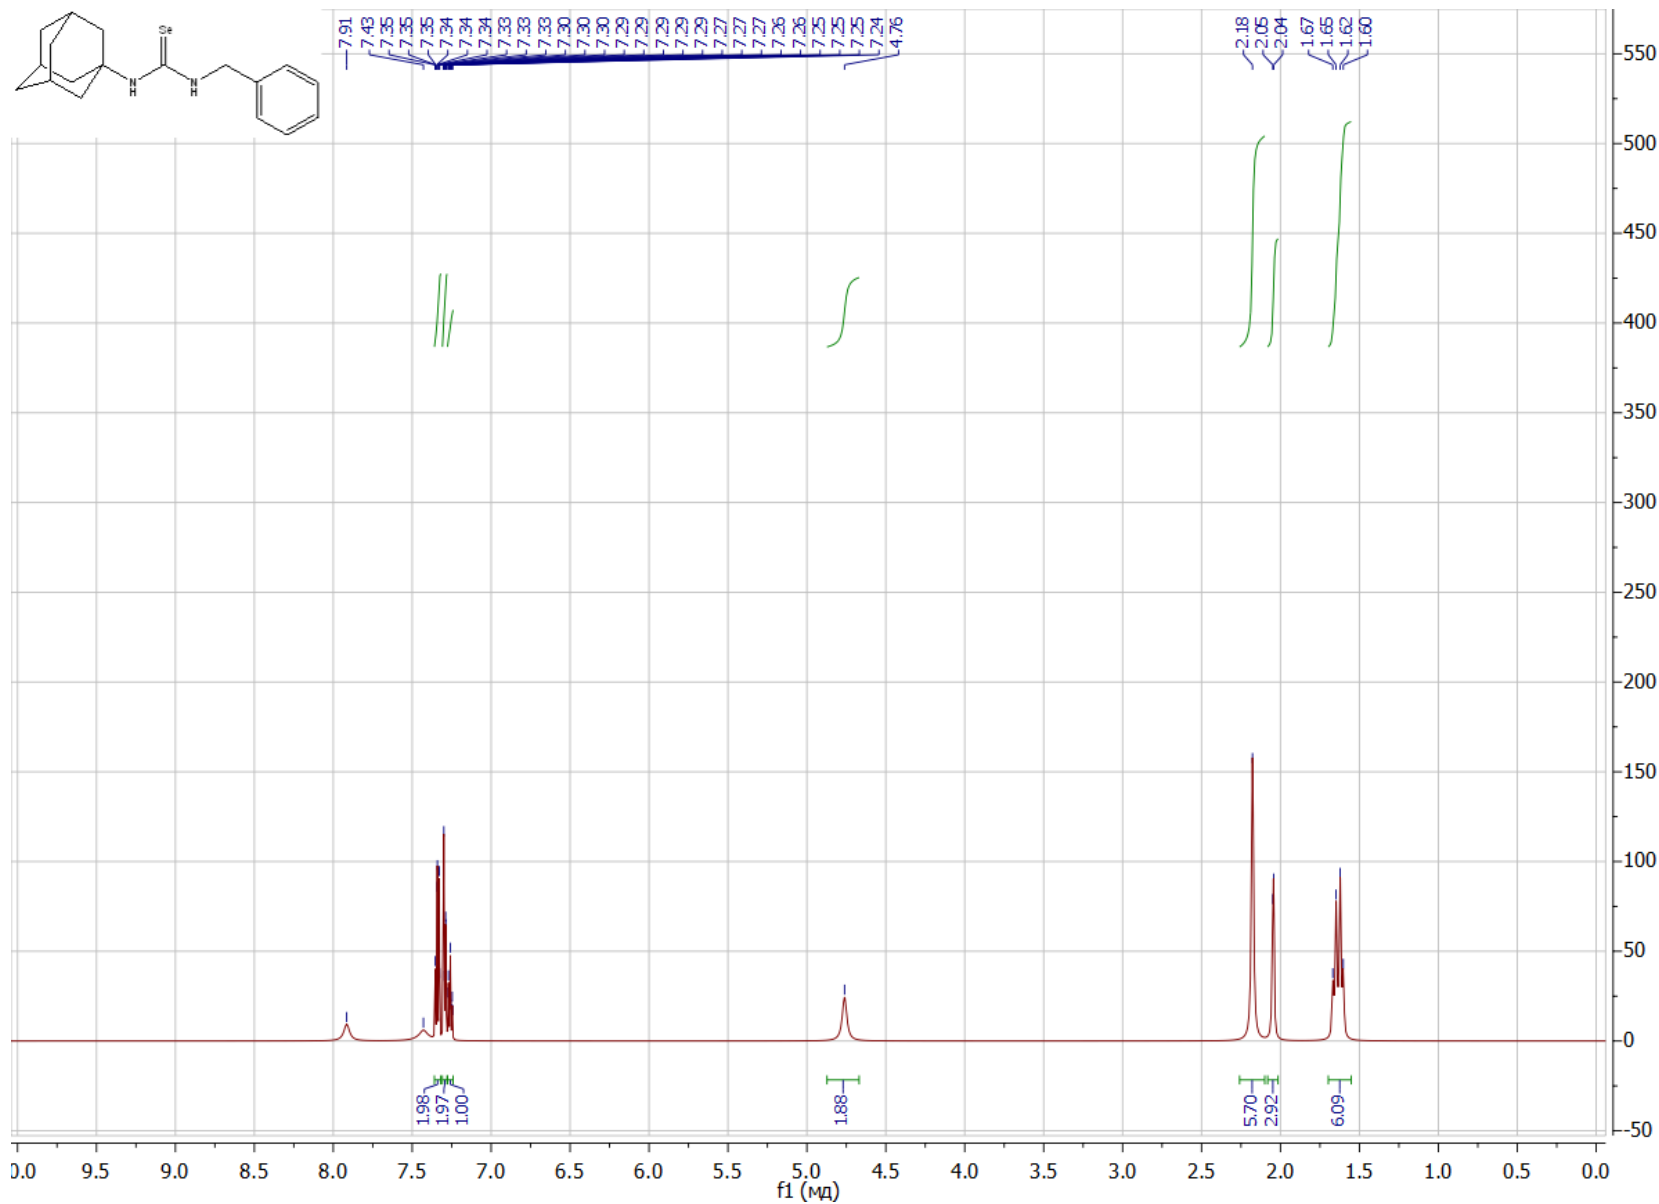

IR of compound 5a

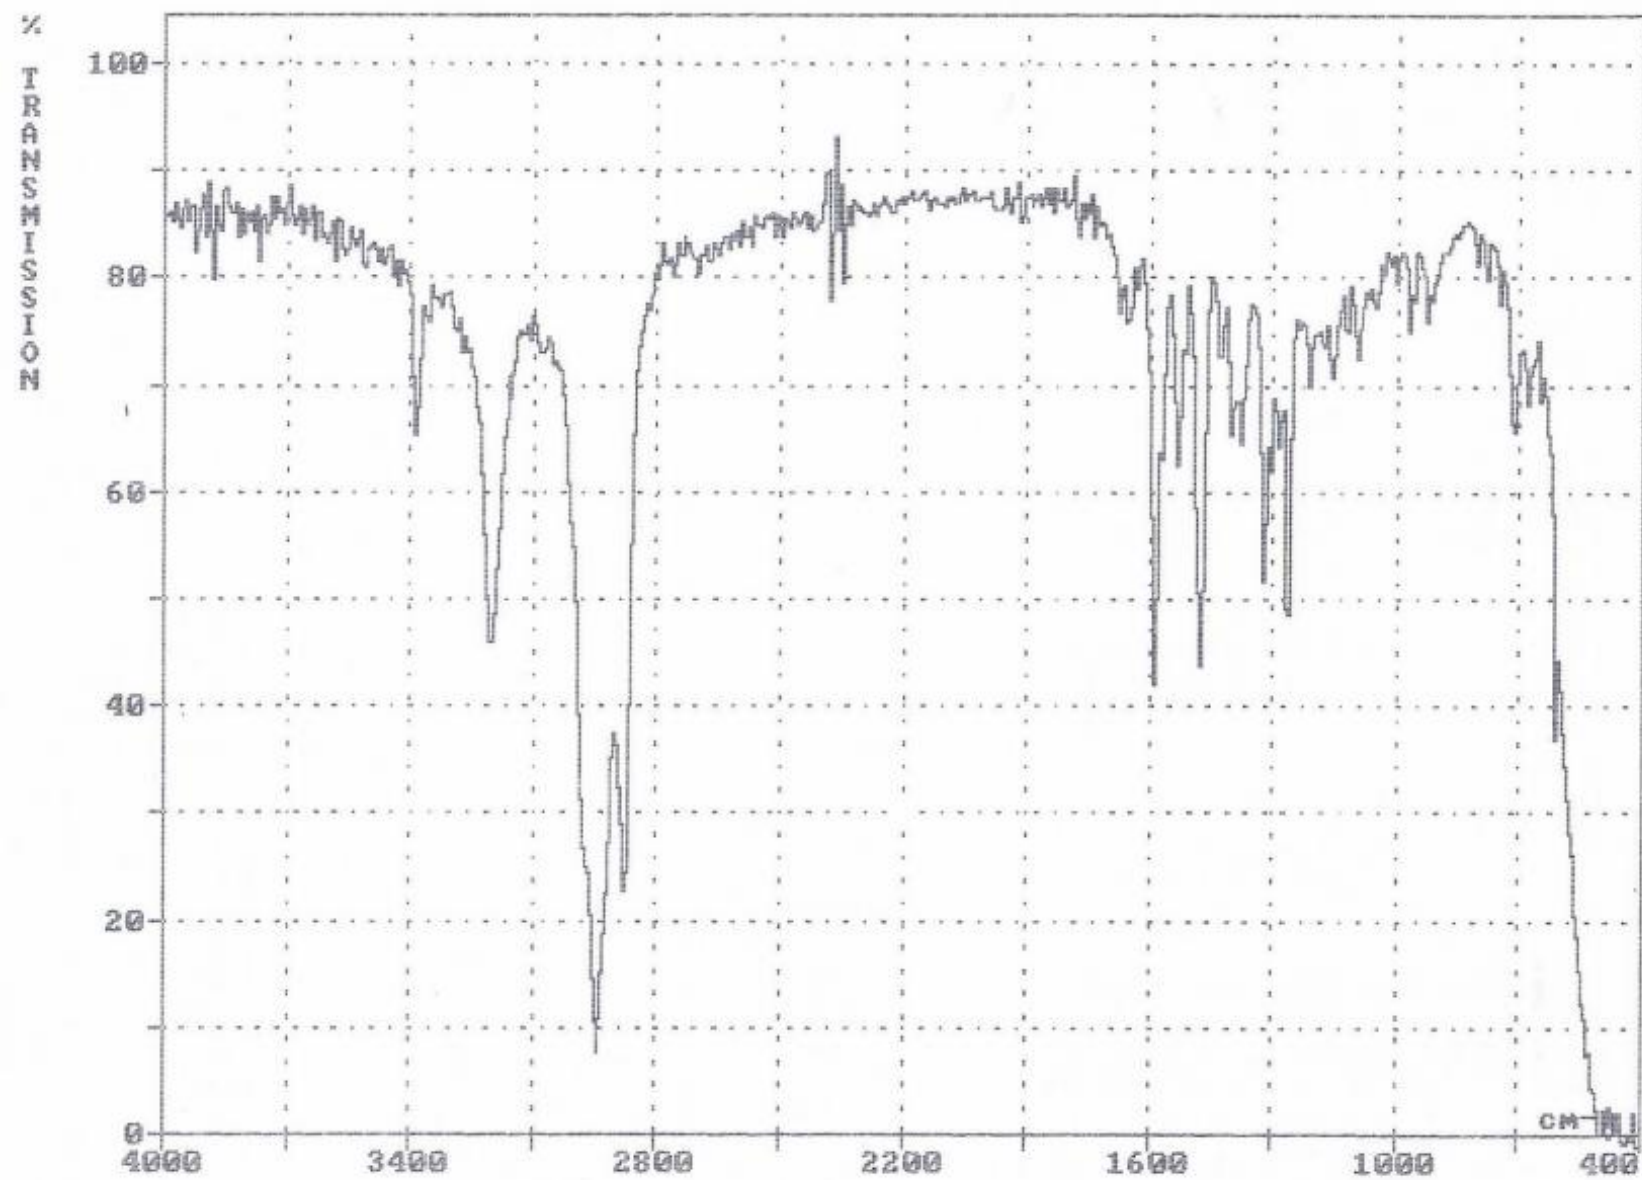

NMR  $^1\text{H}$  of compound 5b

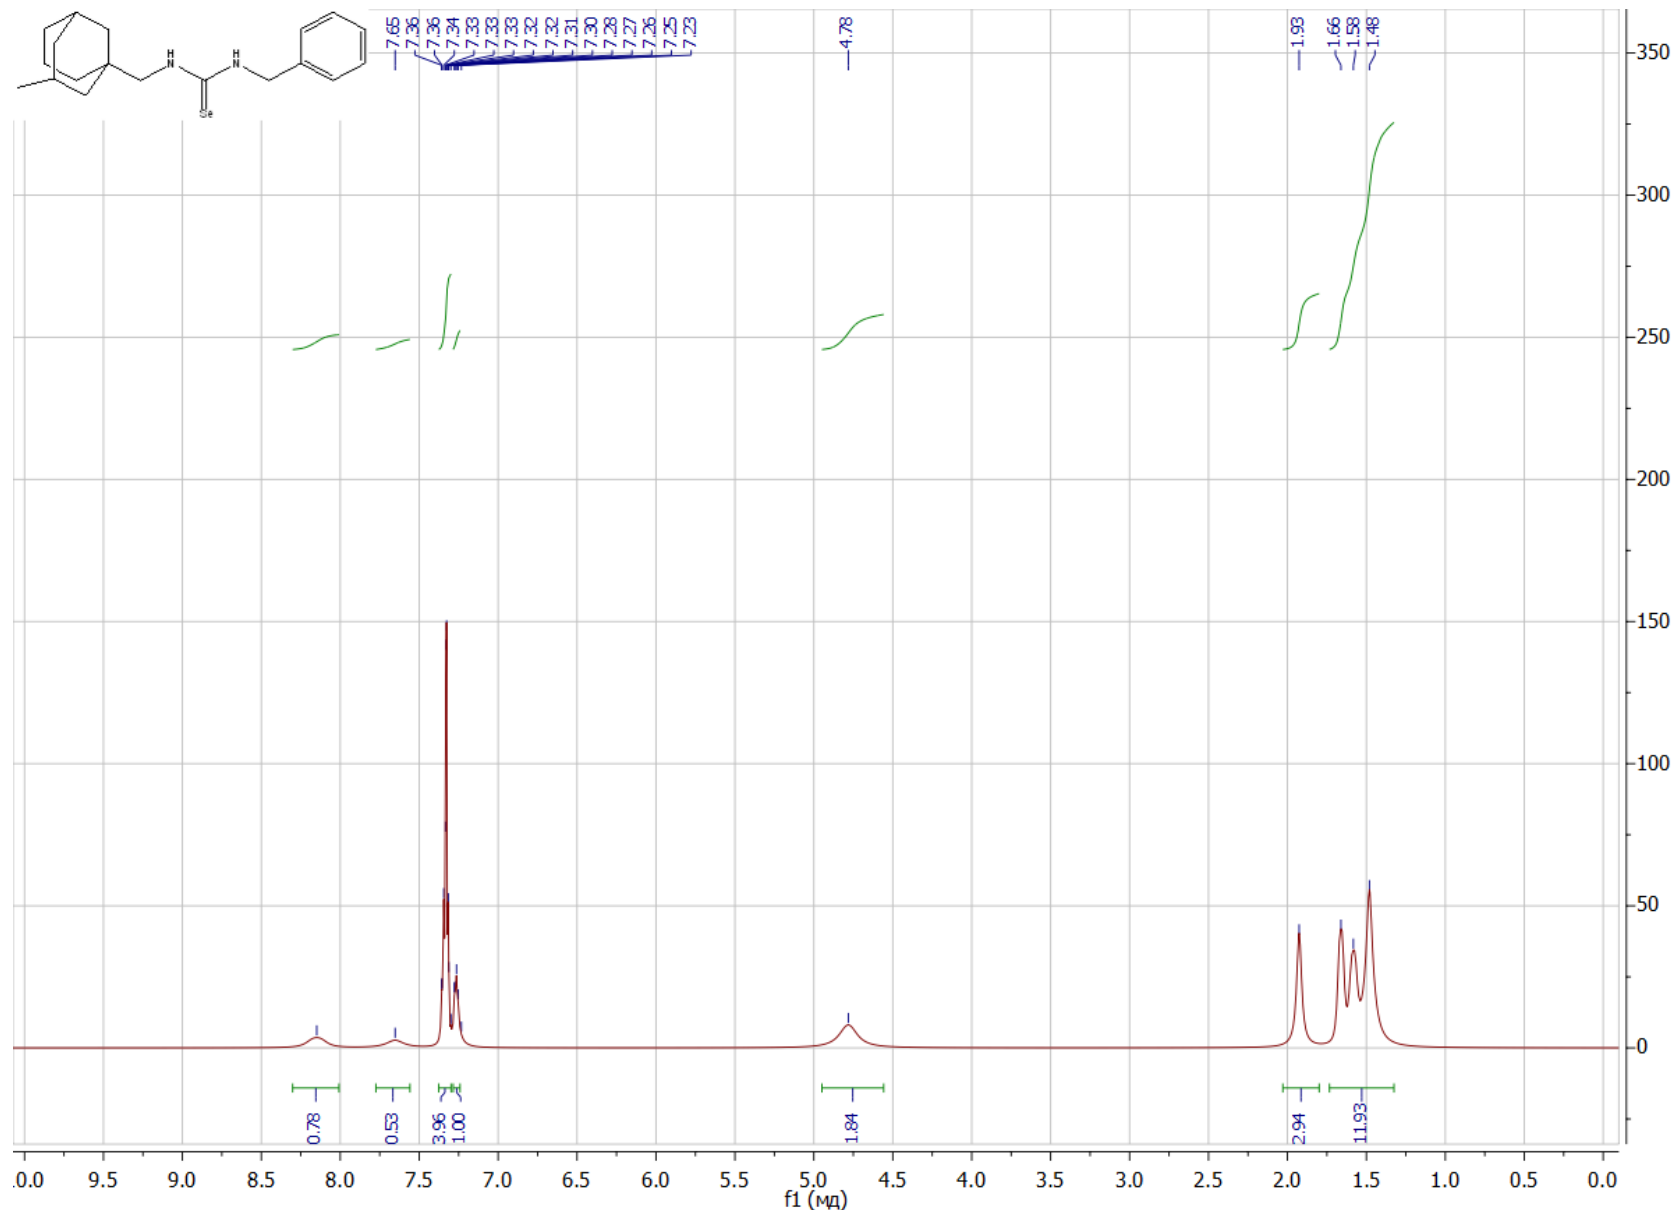

NMR  $^1\text{H}$  of compound 5c

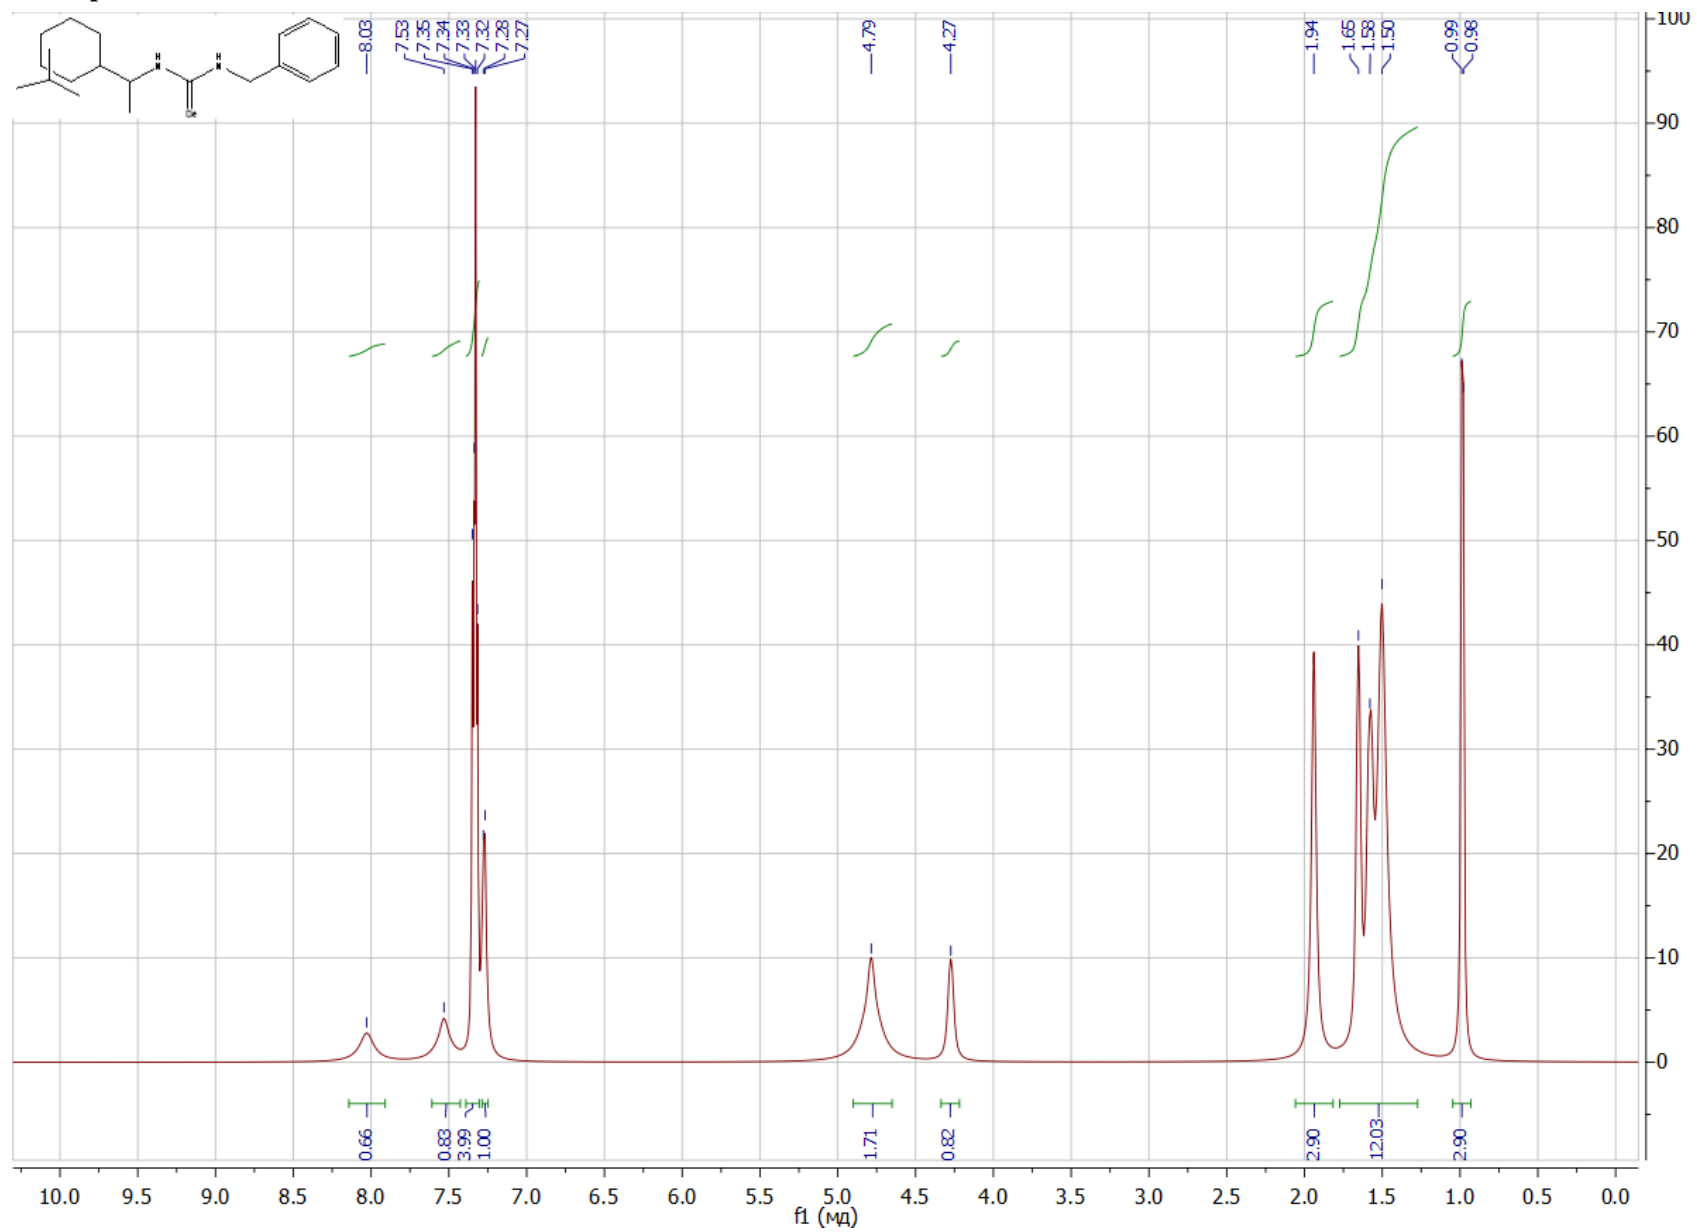

# NMR $^1\text{H}$ of compound 5d

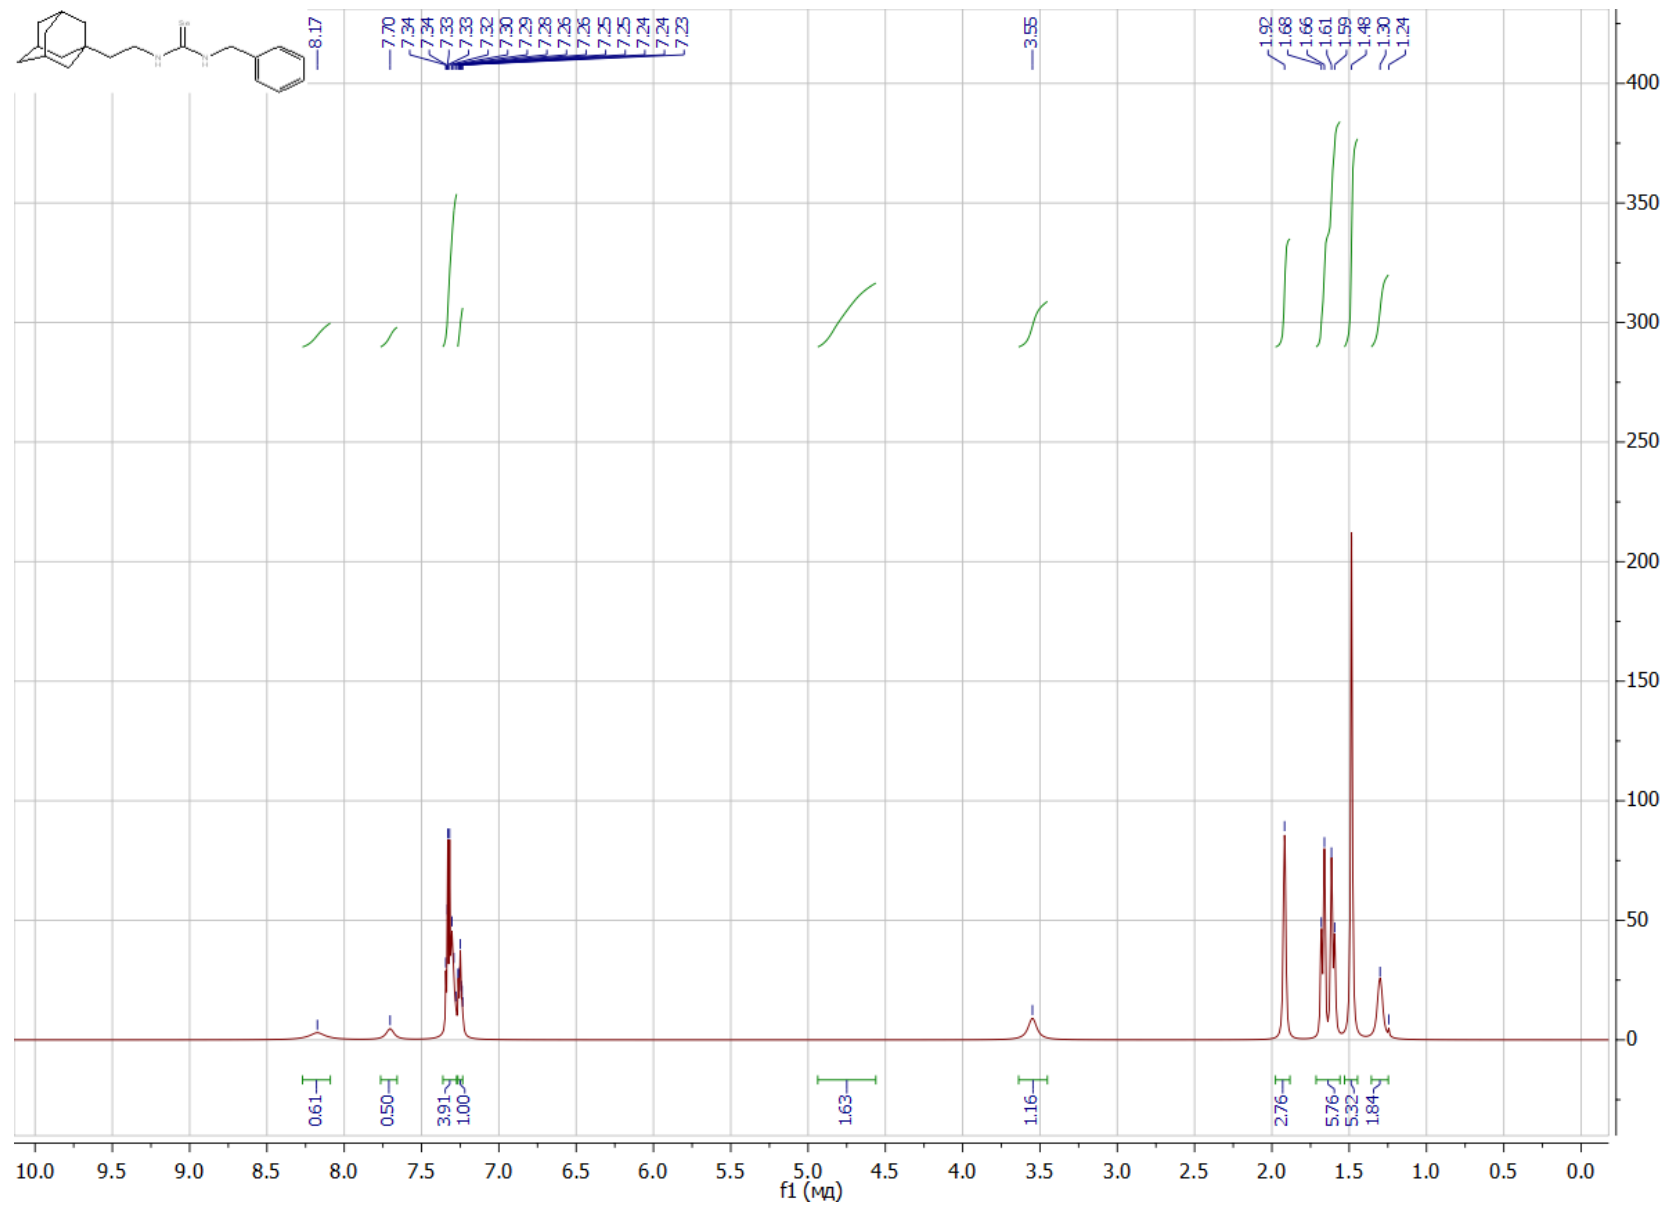

NMR  $^1\text{H}$  of compound 5e

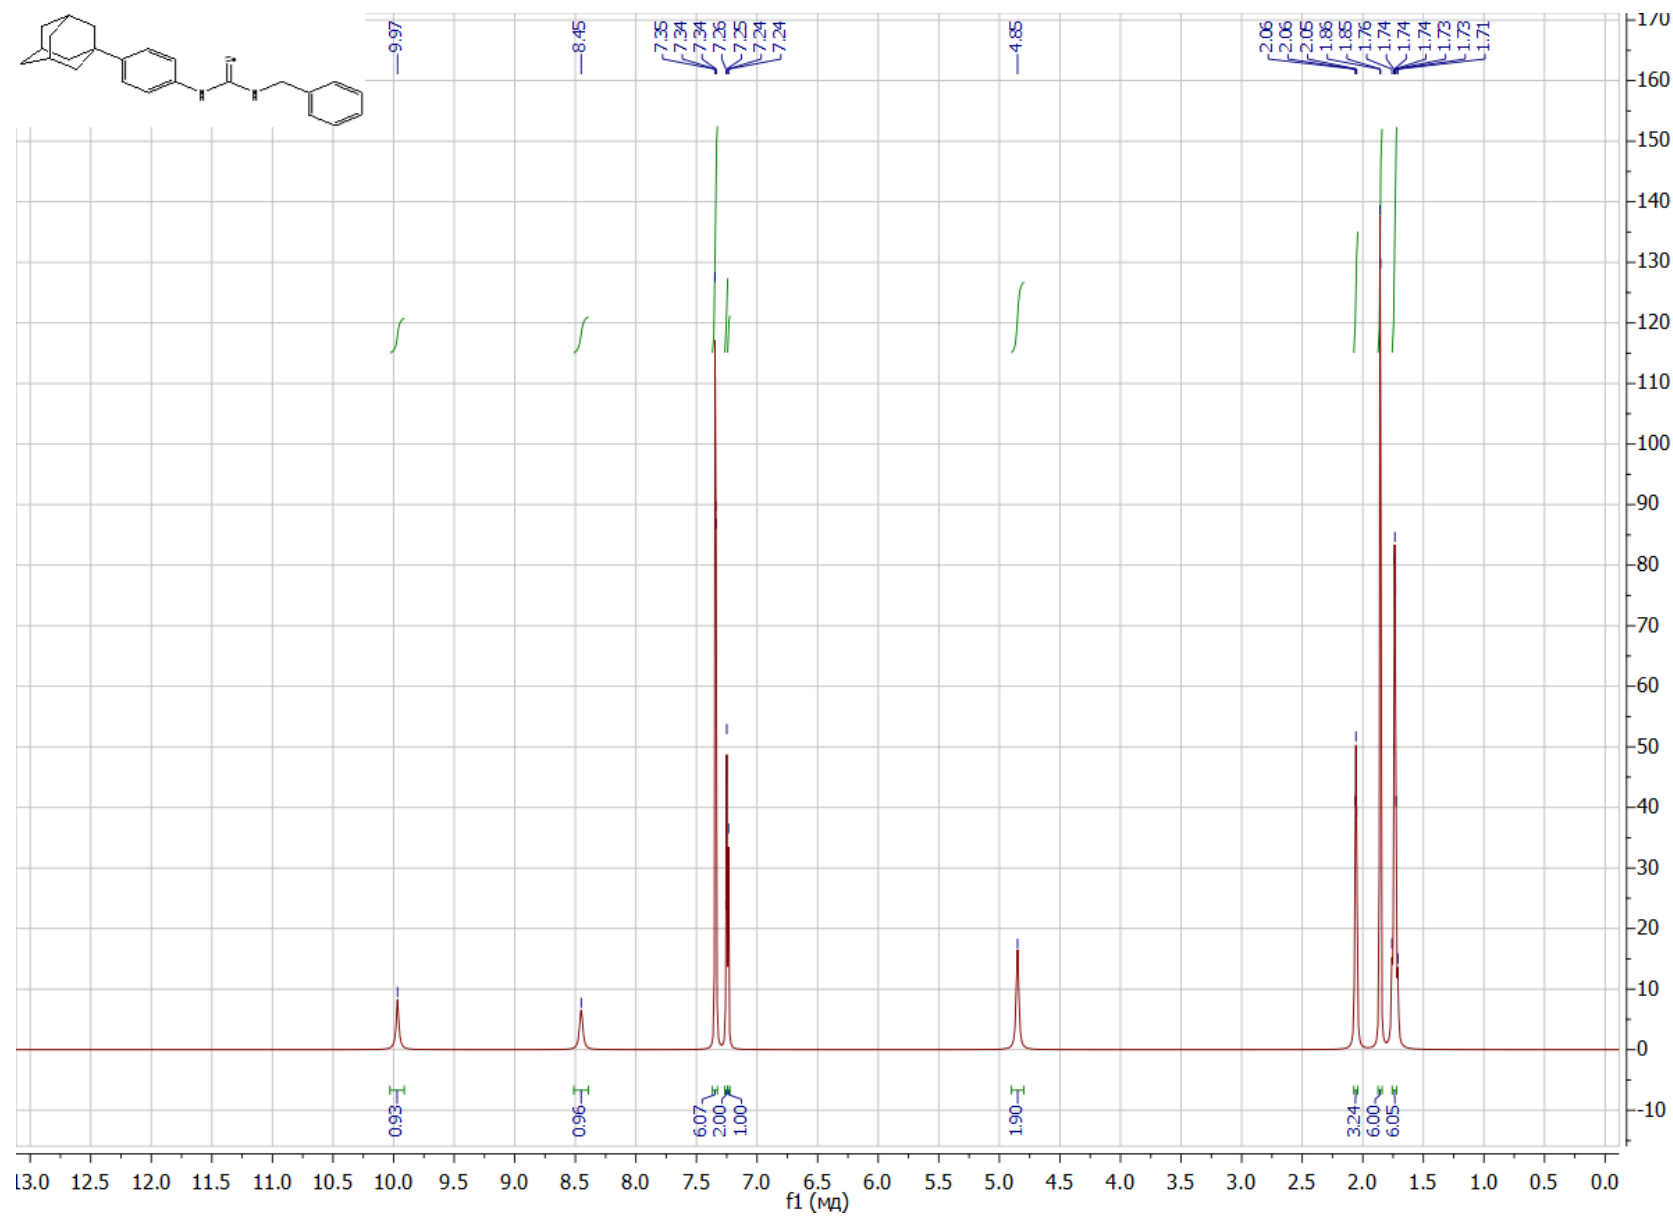

IR of compound 5e

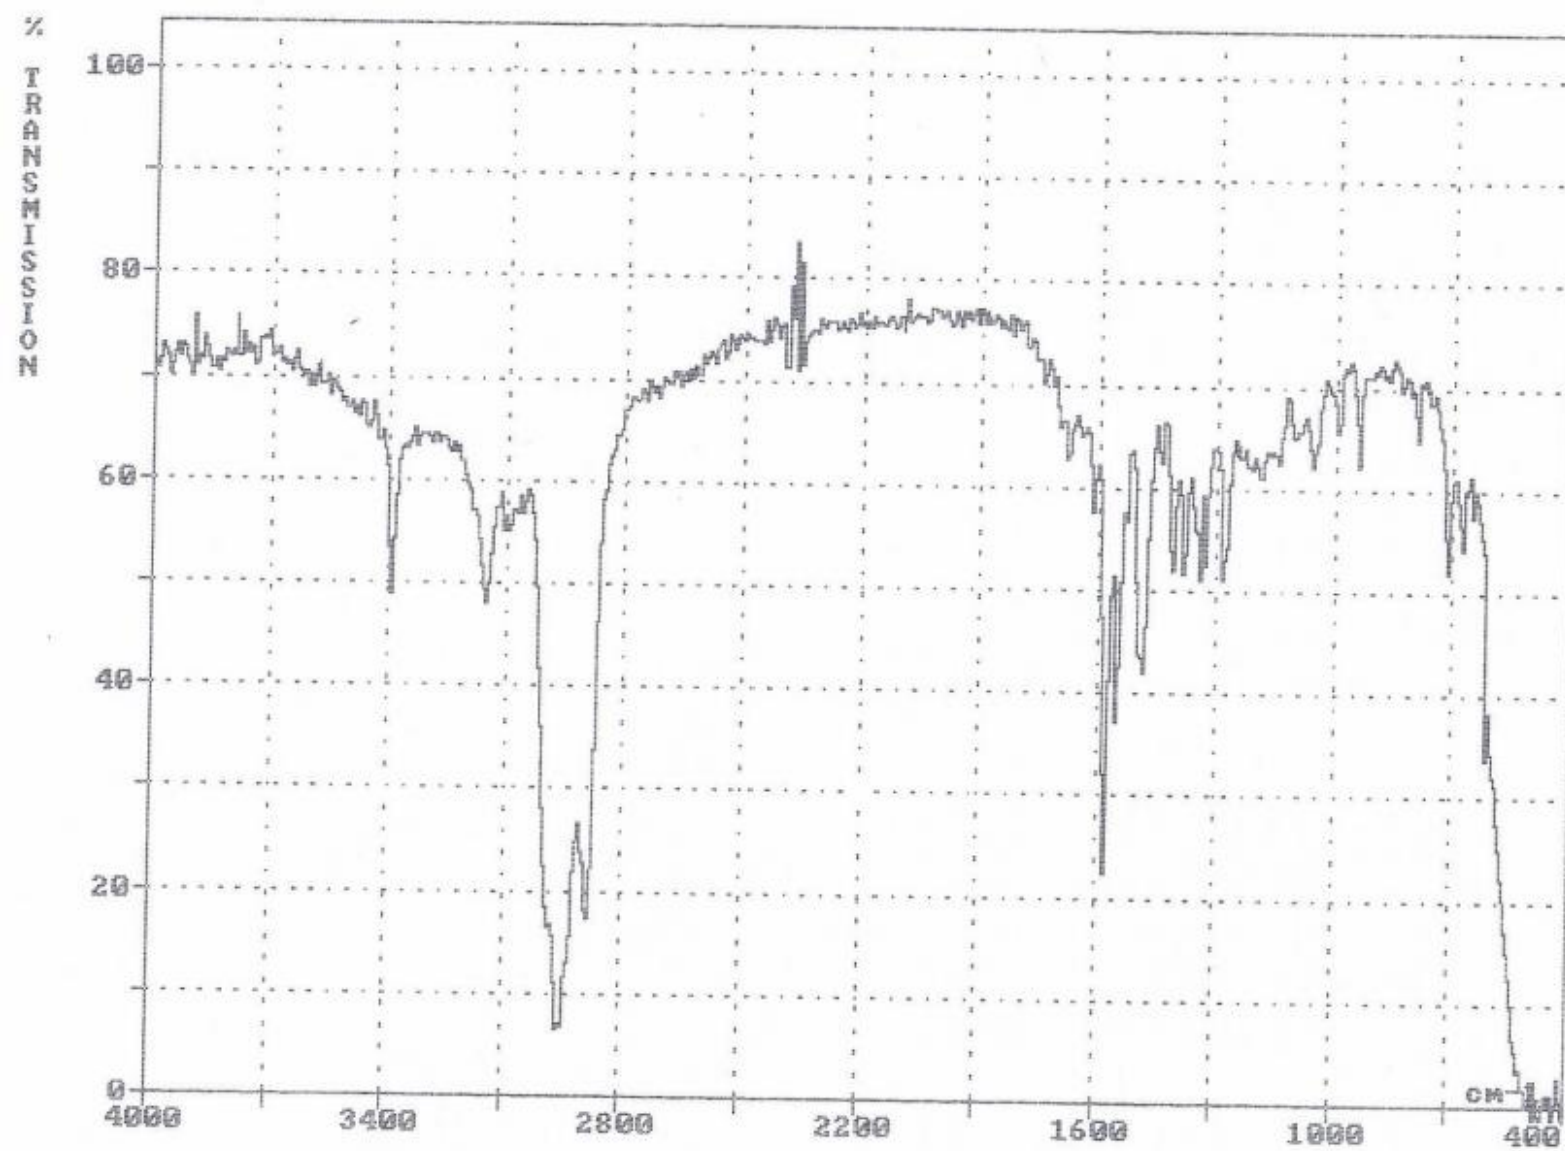

# NMR $^1\text{H}$ of compound 5f

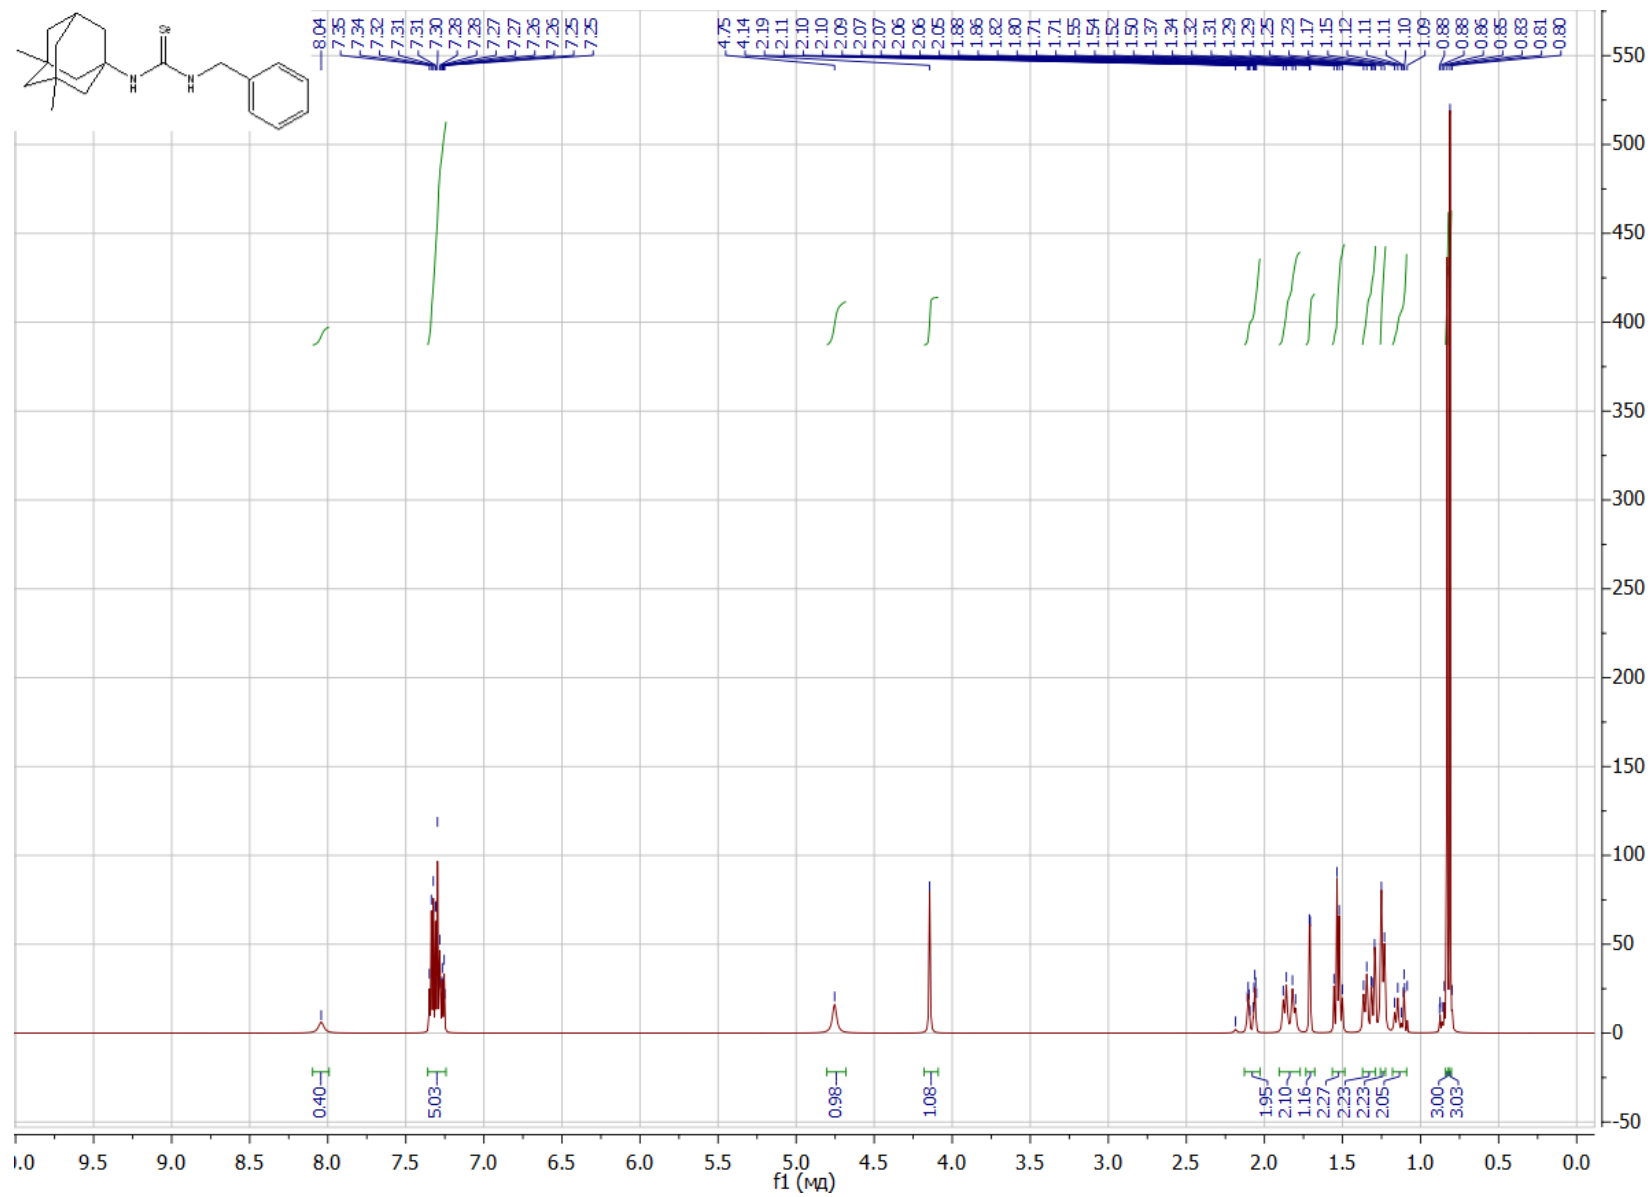



# NMR $^1\text{H}$ of compound 5g

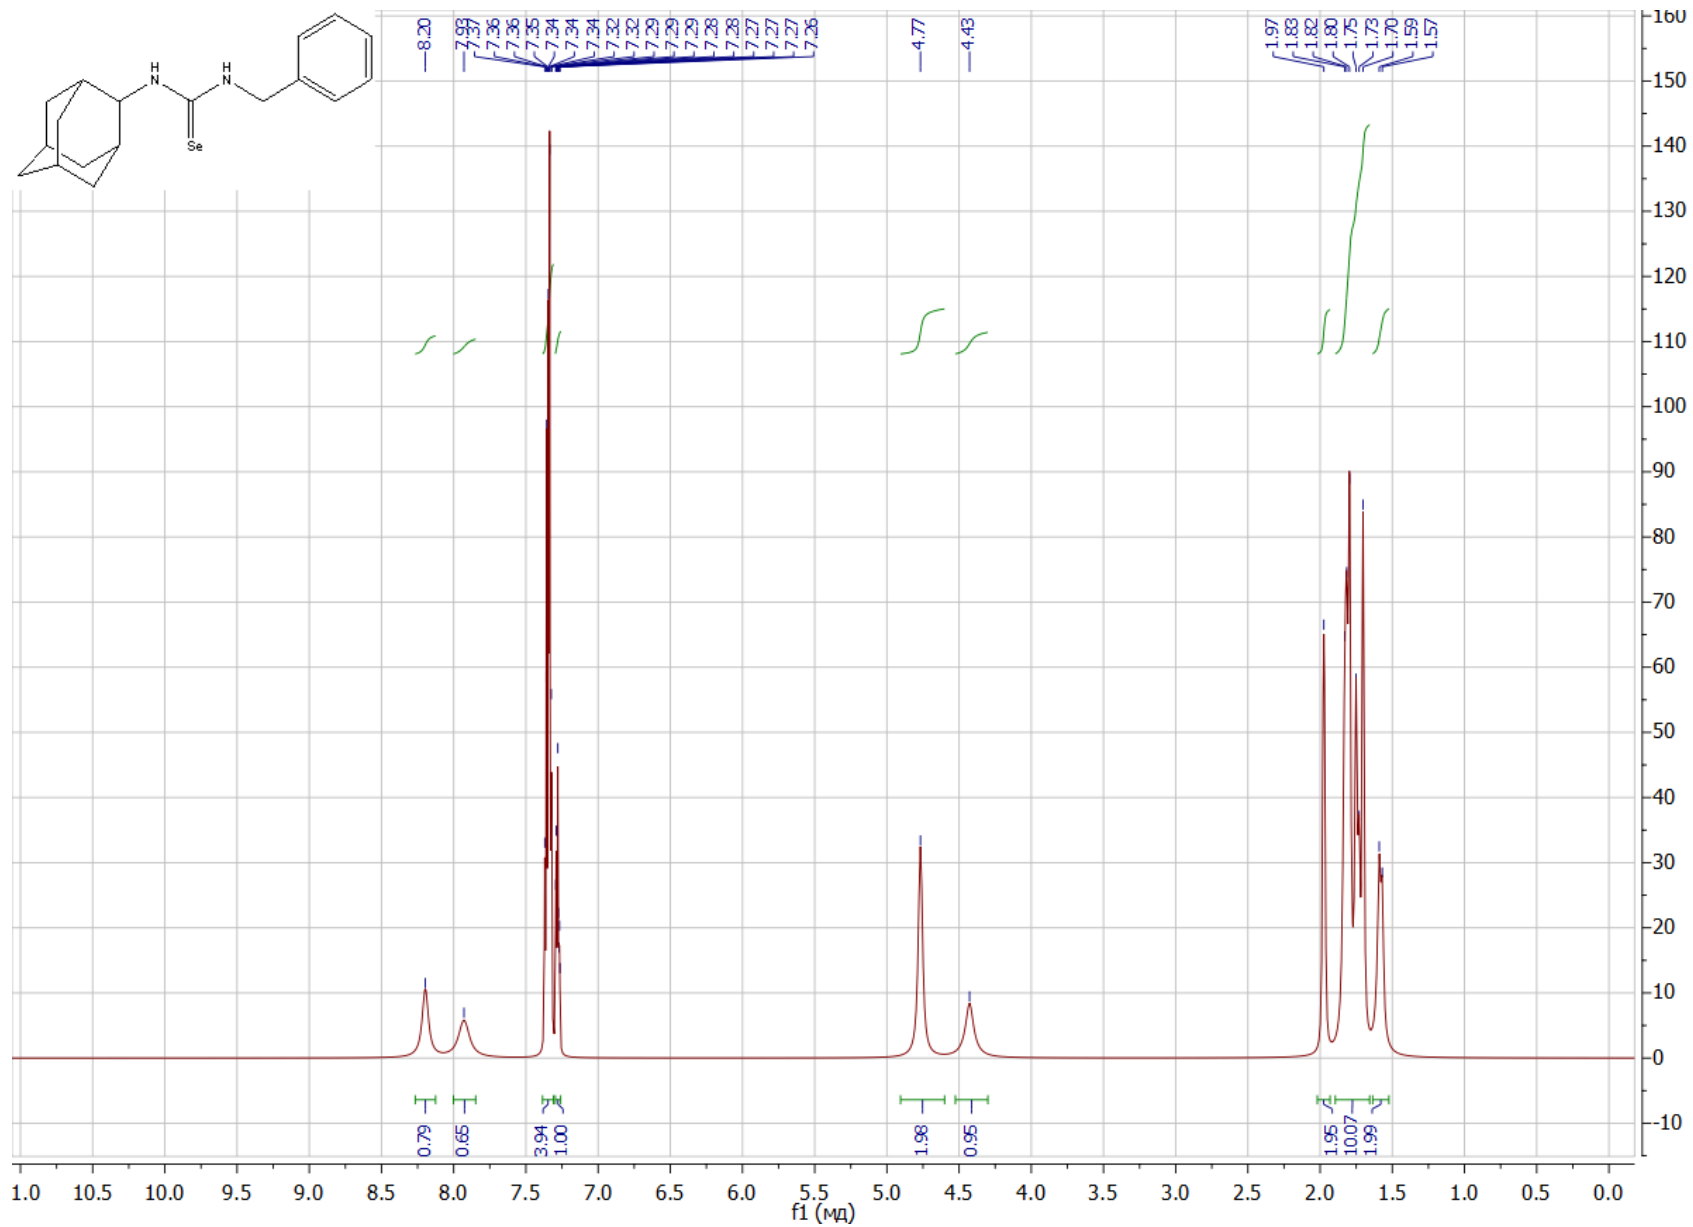

IR of compound 5g

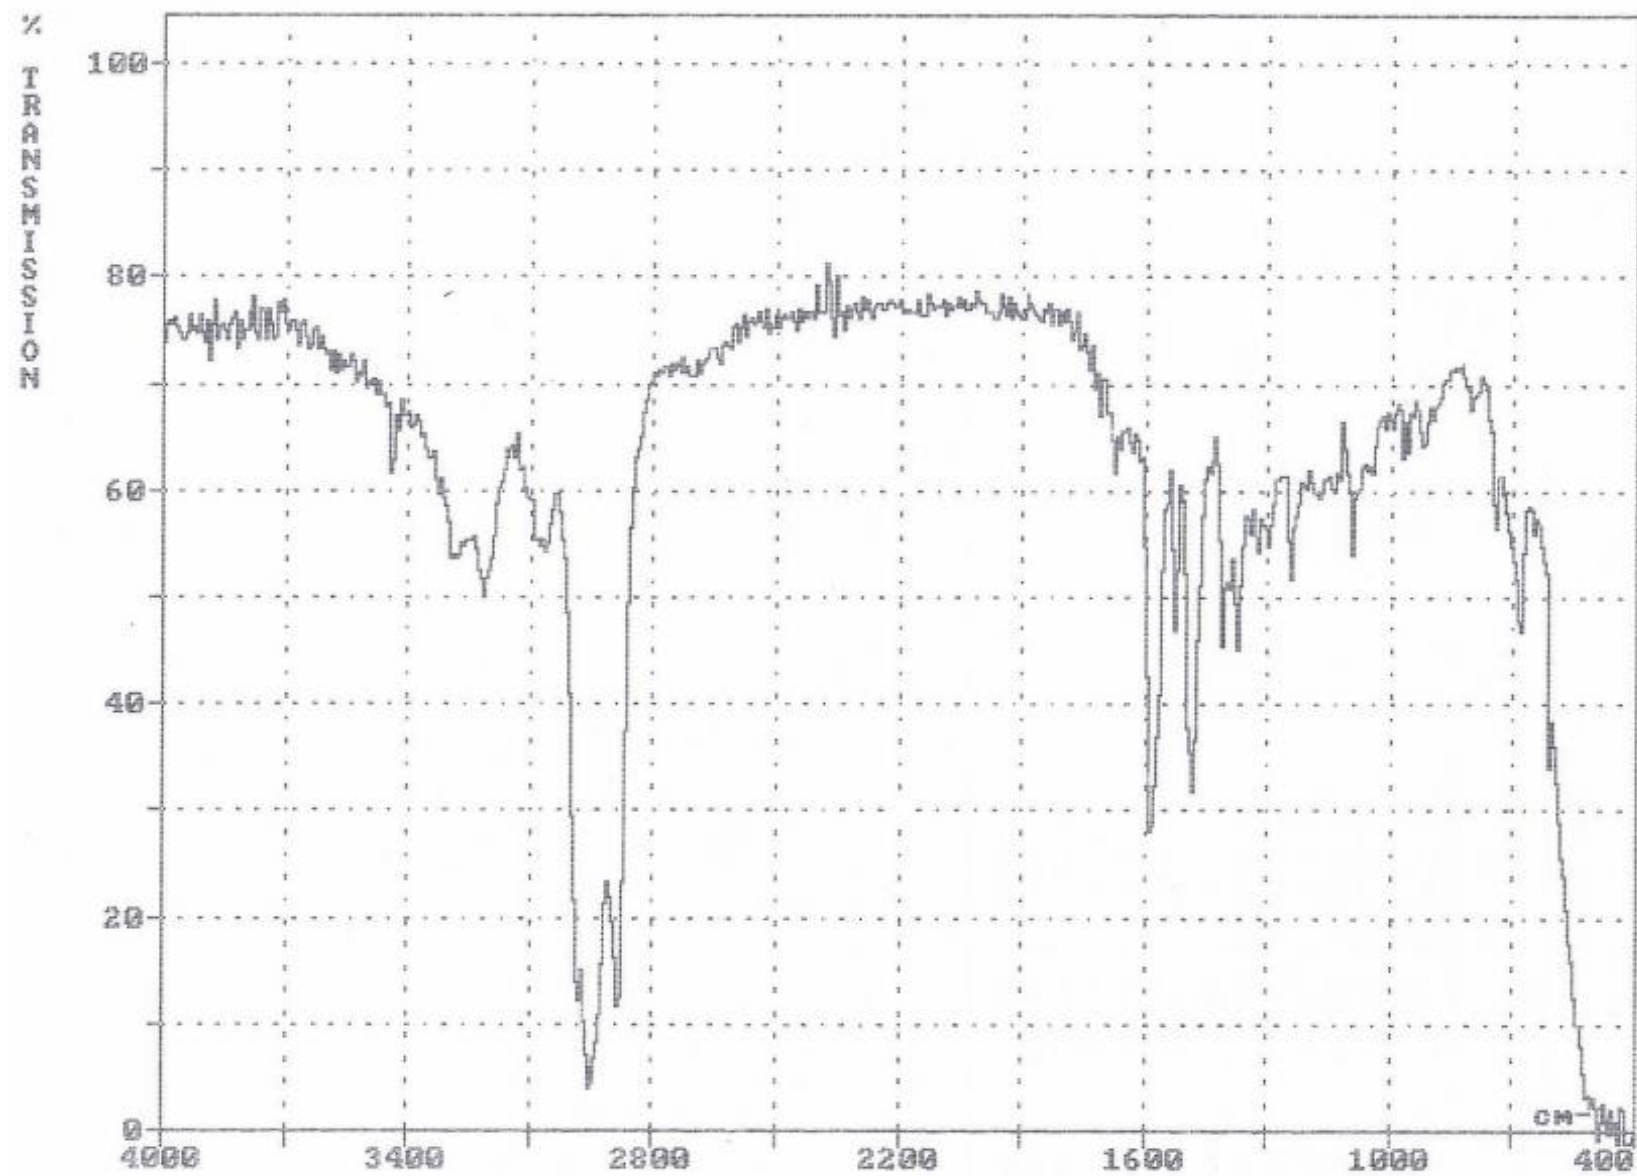

Supplement: s1 [file s1]
